# Supplementary material for: Unexpectedly superior efficiency of chloride-directed double Suzuki–Miyaura cross-coupling reactions to bromide-directed reactions for the synthesis of sterically hindered 2,7-diaryl fluorenes
Source: Royal Society of Chemistry journal article supplement (doi:10.1039/d4nj00718b), 2024-01-01
Supplement: d4nj00718b1.pdf [file d4nj00718b1.pdf]

## Supporting Information

# Unexpectedly Superior Efficiency of Chloride-directed Double Suzuki-Miyaura Cross-coupling Reaction to That of Bromide for the Synthesis of Sterically Hindered 2,7-Diaryl Fluorenes

Yu-Qing Peng, Yong-Qing Li, \* Miao-Miao Liu, Chen Ni and Yu-Cai Cao \*

State Key Laboratory of Polyolefins and Catalysis, Shanghai Key Laboratory of Catalysis Technology for Polyolefins, Shanghai Research Institute of Chemical Industry Co. Ltd., Shanghai 200062, P. R. China  
E-mail: liyongqing@srici.cn, caoyc@srici.cn.

### CONTENTS

|                                                                          |     |
|--------------------------------------------------------------------------|-----|
| 1. General Considerations.....                                           | S1  |
| 2. General procedures for Suzuki-Miyaura cross-coupling reaction .....   | S1  |
| 3. Characterization Data of Double Suzuki-Miyaura coupling products..... | S2  |
| 4. Crystallographic data for <b>7</b> .....                              | S6  |
| 5. NMR Spectra .....                                                     | S10 |
| 6. HRMS analysis reports for the compounds .....                         | S25 |
| 7. References.....                                                       | S32 |

## 1. General Considerations.

All reactions were carried out under a nitrogen atmosphere unless otherwise specified. Unless otherwise noted, commercialized reagents were used without further purification. HPLC yield was determined on Shimadzu LC-20A. Elemental analysis was determined on Elementar vario micro cubo automatic element analyzer. HRMS was measured on Thermo Scientific Q Exactive HF Orbitrap-FTMS.  $^1\text{H}$  NMR and  $^{13}\text{C}$  NMR spectra were recorded on a JEOL JNM-ECZR 500 MHz spectrometer at ambient temperature unless otherwise indicated.  $^1\text{H}$  chemical shifts were referenced to  $\text{CDCl}_3$  (7.26 ppm) and Tetrachloroethane (6.0 ppm),  $^{13}\text{C}$  chemical shifts were referenced to  $\text{CDCl}_3$  (77.16 ppm) and Tetrachloroethane (73.78 ppm).<sup>1</sup> Multiplicities are abbreviated as follows: singlet (s), doublet (d), triplet (t), quartet (q), doublet-doublet (dd), quintet (quint), septet (sept), multiplet (m), and broad (br). NMR reaction controls for the optimization experiments were usually measured by diluting 25 mg of the crude reaction mixture with 0.5 mL of  $\text{CDCl}_3$ , mixed in the NMR tubes.

## 2. General procedures for Suzuki-Miyaura cross-coupling reaction

A mixture of 2,7-diaryl fluorenes (2.5 mmol), arylboronic acid (6.25~7.5 mmol), Pd complex catalyst (0.5~1.0 mol% of Pd loading), and base (5.0~10 mmol) was charged in a solvent (20 mL). The mixture was pumped and refilled with nitrogen three times. The resulting mixture was stirred at 80~100°C under nitrogen for 2 h and then cooled to room temperature, washed with water (200 mL), and EtOH (2× 50 mL). The filtrate was concentrated in *vacuo*, dissolved in dichloromethane (50 mL), dried over sodium sulfate, and purified by crystallization at -20°C to obtain the coupling product.

### 3. Characterization Data of Double Suzuki-Miyaura coupling products.

#### 2,7-diphenylfluorene (1)

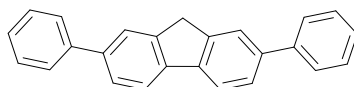

Brown solid (0.66 g, 83%);  $^1\text{H}$  NMR (500 MHz, Tetrachloroethane)  $\delta$  8.00 – 7.84 (m, 4H), 7.84 – 7.64 (m, 6H), 7.64 – 7.33 (m, 6H), 4.09 (s, 2H);  $^{13}\text{C}$  NMR (126 MHz, Tetrachloroethane)  $\delta$  144.01, 141.35, 140.52, 139.91, 128.51, 126.94, 126.91, 125.91, 123.55, 119.92, 36.97. HRMS (ESI)  $m/z$  calcd for  $\text{C}_{25}\text{H}_{18}\text{Na}^+ [\text{M}+\text{Na}]^+$ : 341.1306, found 341.1312. The NMR spectroscopic data matches previously reported data.<sup>2</sup>

#### 2,7-bis(4-*tert*-butylphenyl)fluorene (2)

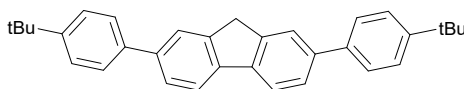

White solid (0.61 g, 57%);  $^1\text{H}$  NMR (500 MHz, Chloroform-*d*)  $\delta$  7.84 (d,  $J = 7.9$  Hz, 2H), 7.78 (s, 2H), 7.63 (d,  $J = 5.4$  Hz, 4H), 7.61 (s, 2H), 7.49 (d,  $J = 8.4$  Hz, 4H), 4.02 (s, 2H), 1.38 (s, 18H);  $^{13}\text{C}$  NMR (126 MHz, Tetrachloroethane)  $\delta$  150.18, 143.96, 140.33, 139.65, 138.19, 126.59, 125.67, 125.41, 123.31, 119.82, 37.02, 34.24, 31.25.; HRMS (ESI)  $m/z$  calcd for  $\text{C}_{33}\text{H}_{35} [\text{M}]^+$ : 431.2739, found 431.2738.

#### 2,7-bis(3,5-dimethylphenyl)fluorene (3)

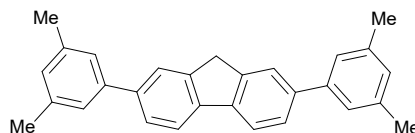

White solid (0.81 g, 87%);  $^1\text{H}$  NMR (500 MHz, Chloroform)  $\delta$  7.86 – 7.76 (m, 4H), 7.62 (dd,  $J = 7.9, 1.7$  Hz, 2H), 7.29 (s, 4H), 7.01 (s, 2H), 4.01 (s, 2H), 2.41 (s, 12H).  $^{13}\text{C}$  NMR (126 MHz, Tetrachloroethane)  $\delta$  143.97, 141.05, 140.27, 139.71, 138.25, 128.94, 128.75, 125.99, 125.15, 125.06, 124.92, 123.73, 120.04, 36.98, 21.50, 21.41; HRMS (ESI)  $m/z$  calcd for  $\text{C}_{29}\text{H}_{26}\text{Na}^+ [\text{M}+\text{Na}]^+$ : 397.1932, found 397.1925. The NMR spectroscopic data matches previously reported data.<sup>3</sup>

#### 2,7-bis(3,5-di-*tert*-butylphenyl)fluorene (4)

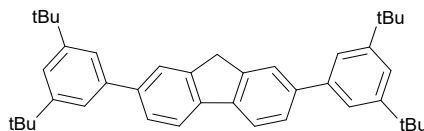

Brown solid (0.80 g, 59%);  $^1\text{H}$  NMR (500 MHz, Chloroform-*d*)  $\delta$  7.86 (d,  $J = 7.9$  Hz, 2H), 7.78 (d,  $J = 0.9$  Hz, 2H), 7.63 (dd,  $J = 7.9, 1.7$  Hz, 2H), 7.50 (d,  $J = 1.8$  Hz, 4H), 7.45 (t,  $J = 1.8$  Hz, 2H), 4.04 (s, 2H), 1.41 (s, 36H);  $^{13}\text{C}$  NMR (126 MHz, Chloroform-*d*)  $\delta$  151.24, 144.16, 141.20, 141.05, 140.58, 126.49, 124.23, 121.88,

121.44, 120.18, 77.40, 77.15, 76.89, 37.22, 35.15, 31.72; HRMS (ESI)  $m/z$  calcd for  $C_{41}H_{50}Na^+ [M+Na]^+$ : 565.3810, found 565.3795.

### 2,7-bis(2-fluorophenyl)fluorene (5)

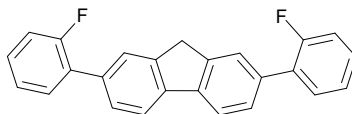

White solid (0.65 g, 73%);  $^1H$  NMR (500 MHz, Chloroform- $d$ )  $\delta$  7.89 (d,  $J = 7.9$  Hz, 2H), 7.77 (d,  $J = 1.7$  Hz, 2H), 7.61 (dt,  $J = 7.9, 1.7$  Hz, 2H), 7.56 – 7.51 (m, 2H), 7.38 – 7.31 (m, 2H), 7.26 (d,  $J = 1.3$  Hz, 1H), 7.25 (d,  $J = 1.3$  Hz, 1H), 7.22 (d,  $J = 1.2$  Hz, 1H), 7.20 (dd,  $J = 2.7, 1.2$  Hz, 1H), 4.02 (s, 2H);  $^{13}C$  NMR (126 MHz, Chloroform- $d$ )  $\delta$  160.99, 159.02, 143.89, 141.01, 134.57, 131.00, 129.01, 128.06, 125.89, 124.54, 120.13, 116.38, 116.20, 77.41, 77.16, 76.91, 37.19; HRMS (ESI)  $m/z$  calcd for  $C_{25}H_{17}F_2 [M]^+$ : 355.1298, found 355.1295.

### 2,7-bis(2-methylphenyl)fluorene (6)

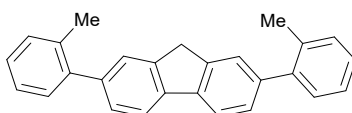

White solid (0.82 g, 95%);  $^1H$  NMR (500 MHz, Chloroform- $d$ )  $\delta$  7.81 (d,  $J = 7.8$  Hz, 2H), 7.49 (s, 2H), 7.34 (d,  $J = 7.8$  Hz, 2H), 7.31 – 7.27 (m, 4H), 7.25 (d,  $J = 3.9$  Hz, 2H), 3.94 (s, 2H), 2.31 (s, 6H);  $^{13}C$  NMR (126 MHz, Chloroform- $d$ )  $\delta$  143.53, 142.41, 140.71, 140.36, 135.65, 130.59, 130.35, 130.13, 128.25, 127.40, 126.10, 126.02, 119.65, 77.53, 77.27, 77.02, 37.20, 20.85; HRMS (ESI)  $m/z$  calcd for  $C_{27}H_{22} [M]^+$ : 346.1716, found 346.1713. The NMR spectroscopic data matches previously reported data.<sup>4</sup>

### 2,7-bis(2-ethylphenyl)fluorene (7)

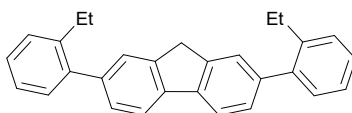

Yellow solid (0.45 g, 48%);  $^1H$  NMR (500 MHz, Chloroform- $d$ )  $\delta$  7.82 – 7.26 (m, 8H), 7.25 – 7.07 (m, 6H), 3.87 (s, 2H), 2.61 (q,  $J = 7.6$  Hz, 4H), 1.07 (t,  $J = 7.5$  Hz, 6H);  $^{13}C$  NMR (126 MHz, Tetrachloroethane)  $\delta$  143.18, 141.69, 141.66, 140.41, 139.76, 130.03, 128.56, 127.97, 127.38, 125.92, 125.53, 119.32, 36.97, 26.18, 15.67; HRMS (ESI)  $m/z$  calcd for  $C_{29}H_{26} [M]^+$ : 374.2029, found 374.2028.

### 2,7-bis(2-*iso*-propylphenyl)fluorene (8)

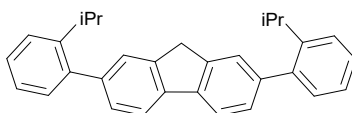

Yellow solid (0.73 g, 73%);  $^1H$  NMR (500 MHz, Chloroform- $d$ )  $\delta$  7.85 (d,  $J = 7.7$  Hz, 2H), 7.50 (s, 2H), 7.43 (dd,  $J = 7.8, 1.3$  Hz, 2H), 7.39 – 7.33 (m, 4H), 7.27 (d,  $J = 5.5$  Hz, 2H), 7.26 – 7.21 (m, 2H), 4.00 (s, 2H), 3.20 – 3.13 (m, 2H), 1.20 (d,  $J = 6.9$  Hz, 12H);  $^{13}C$  NMR (126 MHz, Chloroform- $d$ )  $\delta$  146.61, 143.33, 141.50, 140.74,

140.22, 130.17, 128.24, 127.75, 126.12, 125.67, 119.42, 77.41, 77.16, 76.91, 37.16, 29.56, 24.44; HRMS (ESI)  $m/z$  calcd for  $C_{31}H_{30}[M]^+$ : 402.2342, found 402.2343.

### 2,7-bis(2,6-dimethylphenyl)fluorene (9)

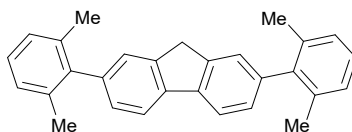

White solid (0.8 g, 85%);  $^1H$  NMR (500 MHz, Chloroform)  $\delta$  7.91 (d,  $J$  = 7.8 Hz, 2H), 7.37 (s, 2H), 7.23 – 7.16 (m, 8H), 4.03 (s, 2H), 2.12 (s, 12H);  $^{13}C$  NMR (126 MHz, Chloroform- $d$ )  $\delta$  143.69, 142.25, 140.18, 139.74, 136.33, 127.83, 127.42, 127.11, 125.81, 119.91, 37.14, 21.05; HRMS (ESI)  $m/z$  calcd. for  $C_{29}H_{26}[M]^+$ : 374.2029, found 374.2027. The NMR spectroscopic data matches previously reported data.<sup>4</sup>

### 2,7-bis(2,6-dimethoxyphenyl)fluorene (10)

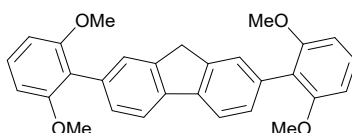

White solid (0.65 g, 59%);  $^1H$  NMR (500 MHz, Chloroform- $d$ )  $\delta$  7.85 (d,  $J$  = 7.8 Hz, 2H), 7.54 (s, 2H), 7.42 – 7.28 (m, 4H), 6.71 (d,  $J$  = 8.4 Hz, 4H), 4.00 (s, 2H), 3.77 (s, 12H);  $^{13}C$  NMR (126 MHz, Chloroform- $d$ )  $\delta$  157.95, 143.08, 140.72, 132.29, 129.48, 128.59, 127.54, 120.12, 119.22, 104.41, 56.11, 37.18; HRMS (ESI)  $m/z$  calcd for  $C_{29}H_{27}O_4 [M]^+$ : 439.1909, found 439.1910.

### 2,7-bis(2,6-di-*iso*-propylphenyl)fluorene (11)

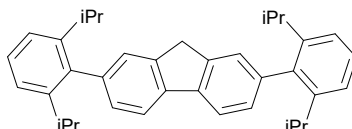

White solid (0.45 g, 37%);  $^1H$  NMR (500 MHz, Chloroform- $d$ )  $\delta$  7.86 (d,  $J$  = 7.6 Hz, 2H), 7.36 (s, 4H), 7.21 (dd,  $J$  = 14.7, 7.4 Hz, 6H), 4.03 (s, 2H), 2.69 (s, 4H), 1.09 (d,  $J$  = 6.9 Hz, 24H);  $^{13}C$  NMR (126 MHz, Chloroform- $d$ )  $\delta$  147.11, 143.26, 140.12, 139.36, 128.71, 127.58, 126.58, 125.98, 123.04, 119.43, 37.21, 30.76, 24.30; HRMS (ESI)  $m/z$  calcd for  $C_{37}H_{43}Na^+ [M+Na]^+$ : 487.3365, found 487.3358.

### 2,7-di(naphthalen-1-yl)fluorene (12)

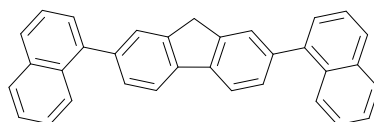

White solid (0.88 g, 85%);  $^1H$  NMR (500 MHz, Chloroform- $d$ )  $\delta$  8.03 (d,  $J$  = 8.4 Hz, 2H), 7.97 (dd,  $J$  = 13.7, 7.9 Hz, 4H), 7.91 (d,  $J$  = 8.1 Hz, 2H), 7.73 (s, 2H), 7.60 – 7.52 (m, 8H), 7.48 (t,  $J$  = 7.7 Hz, 2H), 4.09 (s, 2H);  $^{13}C$  NMR (126 MHz, Chloroform- $d$ )  $\delta$  143.72, 140.75, 140.67, 139.52, 134.00, 131.92, 129.13, 128.46, 127.73, 127.16, 126.94, 126.27, 126.18, 125.93, 125.57, 119.85, 37.20. The NMR spectroscopic data

match previously reported data.<sup>2</sup> HRMS (ESI)  $m/z$  calcd for  $C_{33}H_{22}Na^+$   $[M+Na]^+$ : 441.1619, found 441.1621.

### 2,7-bis(9-anthracenyl)fluorene (13)

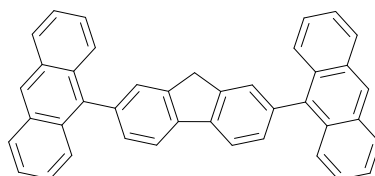

White solid (1.05 g, 81%);  $^1H$  NMR (500 MHz, Tetrachloroethane- $d_2$ )  $\delta$  8.56 (s, 2H), 8.15 (dd,  $J = 24.9, 7.8$  Hz, 6H), 8.00 – 7.84 (m, 4H), 7.76 (s, 2H), 7.68 – 7.38 (m, 10H), 4.24 (s, 2H);  $^{13}C$  NMR (126 MHz, Tetrachloroethane)  $\delta$  143.58, 140.75, 137.56, 137.23, 131.51, 130.43, 130.10, 128.14, 127.99, 126.79, 126.27, 125.12, 124.90, 119.65, 37.04; HRMS (ESI)  $m/z$  calcd for  $C_{41}H_{26}Na^+$   $[M+Na]^+$ : 541.1932, found 541.1926.

### 2,7-bis(9-phenanthrenyl)fluorene (14)

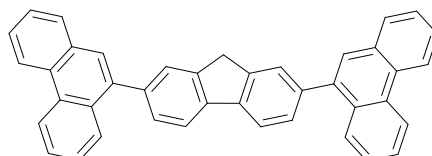

Yellow solid (0.94 g, 73%);  $^1H$  NMR (500 MHz, Tetrachloroethane- $d_2$ )  $\delta$  8.83 (d,  $J = 8.0$  Hz, 2H), 8.77 (d,  $J = 7.8$  Hz, 2H), 8.05 (t,  $J = 9.2$  Hz, 4H), 7.97 (d,  $J = 7.3$  Hz, 2H), 7.82 (d,  $J = 8.0$  Hz, 4H), 7.74 (s, 4H), 7.69 (d,  $J = 7.4$  Hz, 2H), 7.63 (dd,  $J = 18.3, 7.7$  Hz, 4H), 4.15 (s, 2H).;  $^{13}C$  NMR (126 MHz, Tetrachloroethane)  $\delta$  143.54, 140.66, 139.52, 139.03, 131.66, 131.41, 130.72, 130.00, 128.84, 128.48, 127.27, 126.90, 126.65, 126.60, 126.36, 126.33, 126.26, 122.76, 122.40, 119.57, 37.05; HRMS (ESI)  $m/z$  calcd for  $C_{41}H_{26}Na^+$   $[M+Na]^+$ : 541.1932, found 541.1935.

### 2-Chloro-7-(2-fluorophenyl)fluorene (15)

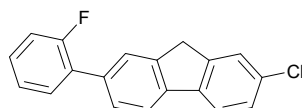

Yellow solid (0.60 g, 80%);  $^1H$  NMR (500 MHz, Chloroform- $d$ )  $\delta$  7.82 (d,  $J = 7.9$  Hz, 1H), 7.76 – 7.69 (m, 2H), 7.58 (dt,  $J = 7.9, 1.7$  Hz, 1H), 7.54 (d,  $J = 1.8$  Hz, 1H), 7.49 (td,  $J = 7.8, 1.8$  Hz, 1H), 7.39 – 7.31 (m, 2H), 7.25 – 7.15 (m, 2H), 3.95 (s, 2H);  $^{13}C$  NMR (126 MHz, Tetrachloroethane)  $\delta$  158.92, 145.25, 143.29, 140.30, 139.99, 134.68, 132.69, 130.91, 130.89, 129.08, 129.01, 128.12, 127.29, 125.87, 125.84, 125.50, 124.52, 124.50, 121.00, 119.98, 116.35, 116.17, 36.94.

## 4. Crystallographic data for 7

Single crystal for X-ray diffraction analysis was isolated for **7** (CCDC: 2327221) by diffusing n-hexane into a solution of the compound in dichloromethane at -20°C. The crystal structure and the characteristic bond lengths and angles of **7** were determined.

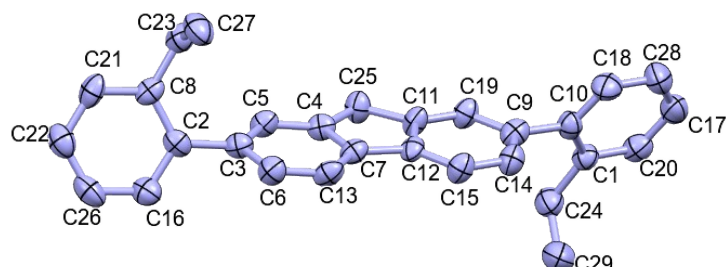

**Figure S-1** Molecular structure of **7** drawn with 50% probability ellipsoids. Hydrogen atoms are omitted for clarity.

**Table S-1** Crystal data and structural refinements parameters of **7**

|                                                                   |                                 |
|-------------------------------------------------------------------|---------------------------------|
| Chemical formula                                                  | C <sub>29</sub> H <sub>26</sub> |
| Mr (g / mol)                                                      | 374.50                          |
| Crystal System                                                    | Triclinic                       |
| Space-Group                                                       | P                               |
| Temperature (K)                                                   | 193(2)                          |
| <i>a</i> (Å)                                                      | 7.944(2)                        |
| <i>b</i> (Å)                                                      | 11.109(3)                       |
| <i>c</i> (Å)                                                      | 13.450(4)                       |
| $\alpha$ (°)                                                      | 70.038(14)                      |
| $\beta$ (°)                                                       | 75.929(15)                      |
| $\gamma$ (°)                                                      | 76.156(14)                      |
| <i>V</i> (Å <sup>3</sup> )                                        | 1066.16                         |
| <i>Z</i>                                                          | 2                               |
| Radiation type                                                    | Ga <i>K</i> $\alpha$            |
| $\mu$ (mm <sup>-1</sup> )                                         | 0.314                           |
| Crystal size (mm <sup>3</sup> )                                   | 0.20 × 0.14 × 0.12              |
| F(000)                                                            | 400                             |
| No. of measured                                                   | 9993                            |
| No. of independent                                                | 2261                            |
| No. of observed [ <i>I</i> > 2 $\sigma$ ( <i>I</i> )] reflections | 1725                            |
| <i>R</i> <sub>int</sub>                                           | 0.0729                          |
| R[ <i>F</i> <sup>2</sup> > 2 $\sigma$ ( <i>F</i> <sup>2</sup> )]  | 0.1416                          |
| <i>wR</i> ( <i>F</i> <sup>2</sup> )                               | 0.3521                          |
| <i>S</i> / <i>Goof</i> / <i>GoF</i>                               | 1.563                           |
| No. of reflections                                                | 2261                            |
| No. of parameters                                                 | 265                             |
| No. of restraints                                                 | 0                               |
| H-atom treatment                                                  | Constr                          |
| $\Delta\rho_{\max}$ (e Å <sup>-3</sup> )                          | 0.774                           |
| $\Delta\rho_{\min}$ (e Å <sup>-3</sup> )                          | -0.381                          |

**Table S-2** The bond length of single crystal structure

| Number | Atom1 | Atom2 | Length   |
|--------|-------|-------|----------|
| 1      | C1    | C10   | 1.391(8) |
| 2      | C1    | C20   | 1.40(1)  |
| 3      | C1    | C24   | 1.50(1)  |
| 4      | C2    | C3    | 1.496(8) |
| 5      | C2    | C8    | 1.421(9) |
| 6      | C2    | C16   | 1.37(1)  |
| 7      | C3    | C5    | 1.38(1)  |
| 8      | C3    | C6    | 1.40(1)  |
| 9      | C4    | C5    | 1.386(8) |
| 10     | C4    | C7    | 1.397(9) |
| 11     | C4    | C25   | 1.50(1)  |
| 12     | C5    | H5    | 0.951    |
| 13     | C6    | H6    | 0.95     |
| 14     | C6    | C13   | 1.369(9) |
| 15     | C7    | C12   | 1.472(9) |
| 16     | C7    | C13   | 1.39(1)  |
| 17     | C8    | C21   | 1.392(9) |
| 18     | C8    | C23   | 1.49(1)  |
| 19     | C9    | C10   | 1.490(9) |
| 20     | C9    | C14   | 1.40(1)  |
| 21     | C9    | C19   | 1.398(8) |
| 22     | C10   | C18   | 1.385(9) |
| 23     | C11   | C12   | 1.40(1)  |
| 24     | C11   | C19   | 1.370(9) |
| 25     | C11   | C25   | 1.496(8) |
| 26     | C12   | C15   | 1.394(8) |
| 27     | C13   | H13   | 0.95     |
| 28     | C14   | H14   | 0.95     |
| 29     | C14   | C15   | 1.388(9) |
| 30     | C15   | H15   | 0.95     |
| 31     | C16   | H16   | 0.95     |
| 32     | C16   | C26   | 1.38(1)  |
| 33     | C17   | H17   | 0.95     |
| 34     | C17   | C20   | 1.38(1)  |
| 35     | C17   | C28   | 1.37(1)  |
| 36     | C18   | H18   | 0.95     |
| 37     | C18   | C28   | 1.38(1)  |
| 38     | C19   | H19   | 0.949    |
| 39     | C20   | H20   | 0.95     |
| 40     | C21   | H21   | 0.949    |
| 41     | C21   | C22   | 1.40(1)  |
| 42     | C22   | H22   | 0.95     |
| 43     | C22   | C26   | 1.38(1)  |
| 44     | C23   | H23A  | 0.99     |
| 45     | C23   | H23B  | 0.99     |
| 46     | C23   | C27   | 1.499(9) |
| 47     | C24   | H24A  | 0.99     |
| 48     | C24   | H24B  | 0.99     |
| 49     | C24   | C29   | 1.49(1)  |
| 50     | C25   | H25A  | 0.99     |
| 51     | C25   | H25B  | 0.99     |
| 52     | C26   | H26   | 0.95     |
| 53     | C27   | H27A  | 0.98     |



|    |     |      |       |
|----|-----|------|-------|
| 54 | C27 | H27B | 0.98  |
| 55 | C27 | H27C | 0.979 |
| 56 | C28 | H28  | 0.95  |
| 57 | C29 | H29A | 0.98  |
| 58 | C29 | H29B | 0.98  |
| 59 | C29 | H29C | 0.98  |

**Table S-3** The bond Angle of the single crystal structure

| Number | Atom1 | Atom2 | Atom3 | Angle    |
|--------|-------|-------|-------|----------|
| 1      | C10   | C1    | C20   | 118.2(6) |
| 2      | C10   | C1    | C24   | 122.9(6) |
| 3      | C20   | C1    | C24   | 118.8(6) |
| 4      | C3    | C2    | C8    | 120.5(6) |
| 5      | C3    | C2    | C16   | 119.9(6) |
| 6      | C8    | C2    | C16   | 119.7(6) |
| 7      | C2    | C3    | C5    | 120.7(6) |
| 8      | C2    | C3    | C6    | 120.4(6) |
| 9      | C5    | C3    | C6    | 118.9(6) |
| 10     | C5    | C4    | C7    | 120.0(6) |
| 11     | C5    | C4    | C25   | 130.2(6) |
| 12     | C7    | C4    | C25   | 109.7(5) |
| 13     | C3    | C5    | C4    | 120.4(6) |
| 14     | C3    | C5    | H5    | 119.9    |
| 15     | C4    | C5    | H5    | 119.8    |
| 16     | C3    | C6    | H6    | 119.4    |
| 17     | C3    | C6    | C13   | 121.2(6) |
| 18     | H6    | C6    | C13   | 119.4    |
| 19     | C4    | C7    | C12   | 108.4(6) |
| 20     | C4    | C7    | C13   | 119.7(6) |
| 21     | C12   | C7    | C13   | 131.9(6) |
| 22     | C2    | C8    | C21   | 118.3(6) |
| 23     | C2    | C8    | C23   | 122.5(6) |
| 24     | C21   | C8    | C23   | 118.9(6) |
| 25     | C10   | C9    | C14   | 119.7(6) |
| 26     | C10   | C9    | C19   | 121.8(6) |
| 27     | C14   | C9    | C19   | 118.5(6) |
| 28     | C1    | C10   | C9    | 121.4(6) |
| 29     | C1    | C10   | C18   | 119.2(6) |
| 30     | C9    | C10   | C18   | 119.4(6) |
| 31     | C12   | C11   | C19   | 119.5(6) |
| 32     | C12   | C11   | C25   | 109.8(6) |
| 33     | C19   | C11   | C25   | 130.6(6) |
| 34     | C7    | C12   | C11   | 108.4(6) |
| 35     | C7    | C12   | C15   | 131.1(6) |
| 36     | C11   | C12   | C15   | 120.5(6) |
| 37     | C6    | C13   | C7    | 119.8(6) |
| 38     | C6    | C13   | H13   | 120.1    |
| 39     | C7    | C13   | H13   | 120.1    |
| 40     | C9    | C14   | H14   | 119.5    |
| 41     | C9    | C14   | C15   | 120.9(6) |
| 42     | H14   | C14   | C15   | 119.6    |
| 43     | C12   | C15   | C14   | 119.1(6) |
| 44     | C12   | C15   | H15   | 120.5    |
| 45     | C14   | C15   | H15   | 120.4    |

|     |      |     |      |          |
|-----|------|-----|------|----------|
| 46  | C2   | C16 | H16  | 119      |
| 47  | C2   | C16 | C26  | 121.9(7) |
| 48  | H16  | C16 | C26  | 119.1    |
| 49  | H17  | C17 | C20  | 120.4    |
| 50  | H17  | C17 | C28  | 120.3    |
| 51  | C20  | C17 | C28  | 119.3(7) |
| 52  | C10  | C18 | H18  | 119.2    |
| 53  | C10  | C18 | C28  | 121.6(7) |
| 54  | H18  | C18 | C28  | 119.2    |
| 55  | C9   | C19 | C11  | 121.4(6) |
| 56  | C9   | C19 | H19  | 119.3    |
| 57  | C11  | C19 | H19  | 119.3    |
| 58  | C1   | C20 | C17  | 121.9(7) |
| 59  | C1   | C20 | H20  | 119      |
| 60  | C17  | C20 | H20  | 119      |
| 61  | C8   | C21 | H21  | 119.6    |
| 62  | C8   | C21 | C22  | 120.8(6) |
| 63  | H21  | C21 | C22  | 119.6    |
| 64  | C21  | C22 | H22  | 120.1    |
| 65  | C21  | C22 | C26  | 119.8(7) |
| 66  | H22  | C22 | C26  | 120.1    |
| 67  | C8   | C23 | H23A | 109.1    |
| 68  | C8   | C23 | H23B | 109      |
| 69  | C8   | C23 | C27  | 112.7(6) |
| 70  | H23A | C23 | H23B | 107.8    |
| 71  | H23A | C23 | C27  | 109.1    |
| 72  | H23B | C23 | C27  | 109      |
| 73  | C1   | C24 | H24A | 109.3    |
| 74  | C1   | C24 | H24B | 109.2    |
| 75  | C1   | C24 | C29  | 112.0(6) |
| 76  | H24A | C24 | H24B | 107.9    |
| 77  | H24A | C24 | C29  | 109.2    |
| 78  | H24B | C24 | C29  | 109.2    |
| 79  | C4   | C25 | C11  | 103.5(5) |
| 80  | C4   | C25 | H25A | 111      |
| 81  | C4   | C25 | H25B | 111.1    |
| 82  | C11  | C25 | H25A | 111.1    |
| 83  | C11  | C25 | H25B | 111.1    |
| 84  | H25A | C25 | H25B | 109      |
| 85  | C16  | C26 | C22  | 119.5(7) |
| 86  | C16  | C26 | H26  | 120.3    |
| 87  | C22  | C26 | H26  | 120.2    |
| 88  | C23  | C27 | H27A | 109.4    |
| 89  | C23  | C27 | H27B | 109.4    |
| 90  | C23  | C27 | H27C | 109.5    |
| 91  | H27A | C27 | H27B | 109.5    |
| 92  | H27A | C27 | H27C | 109.5    |
| 93  | H27B | C27 | H27C | 109.5    |
| 94  | C17  | C28 | C18  | 119.8(7) |
| 95  | C17  | C28 | H28  | 120.1    |
| 96  | C18  | C28 | H28  | 120.1    |
| 97  | C24  | C29 | H29A | 109.5    |
| 98  | C24  | C29 | H29B | 109.5    |
| 99  | C24  | C29 | H29C | 109.5    |
| 100 | H29A | C29 | H29B | 109.5    |

|     |      |     |      |       |
|-----|------|-----|------|-------|
| 101 | H29A | C29 | H29C | 109.5 |
| 102 | H29B | C29 | H29C | 109.5 |

## 5. NMR Spectra

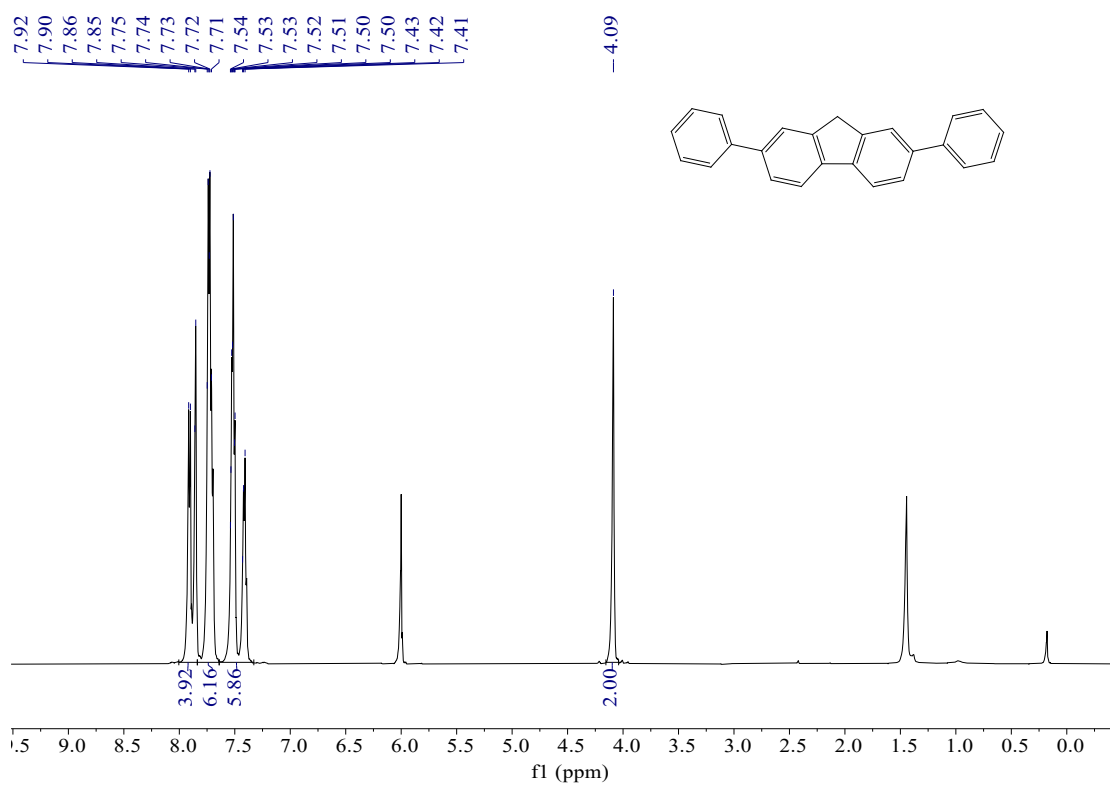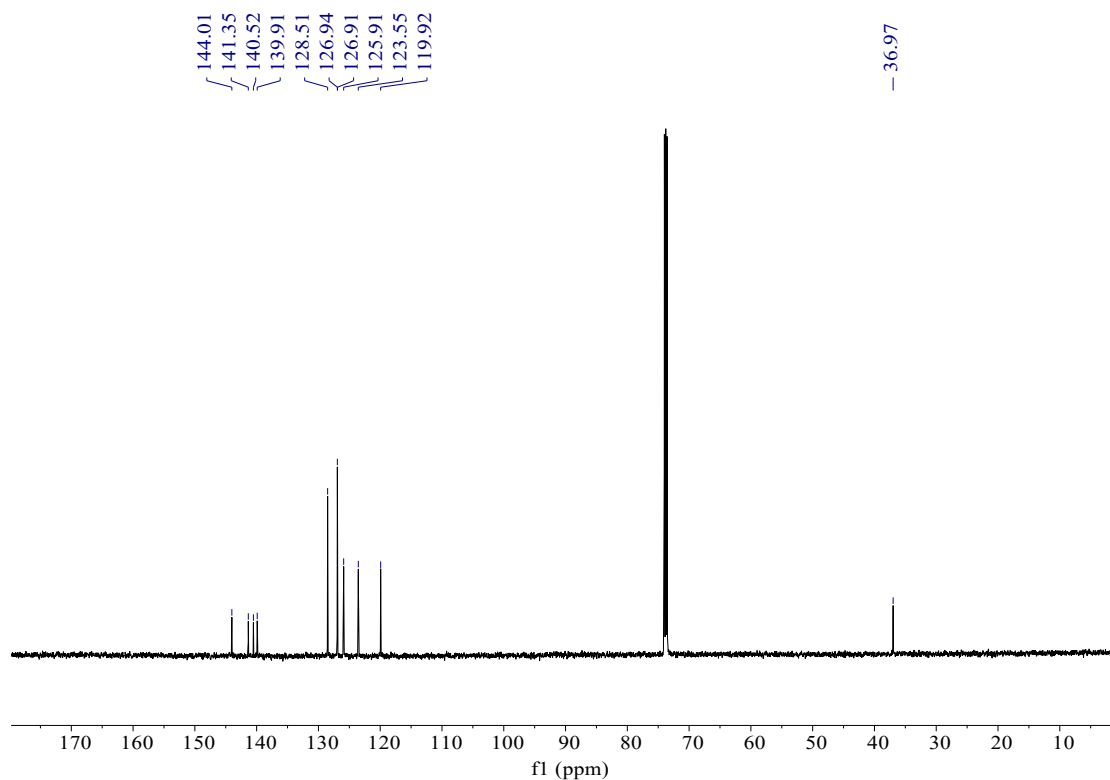

$^1\text{H}$  and  $^{13}\text{C}$  NMR of 2,7-diphenylfluorene (1)

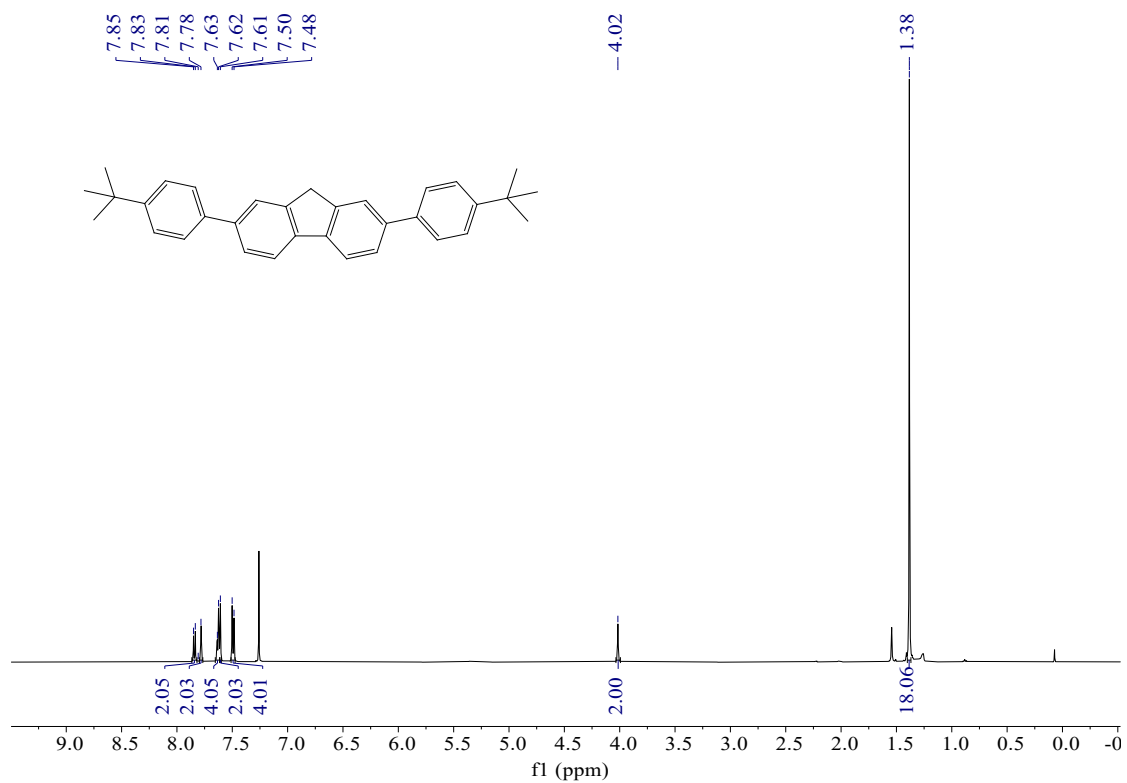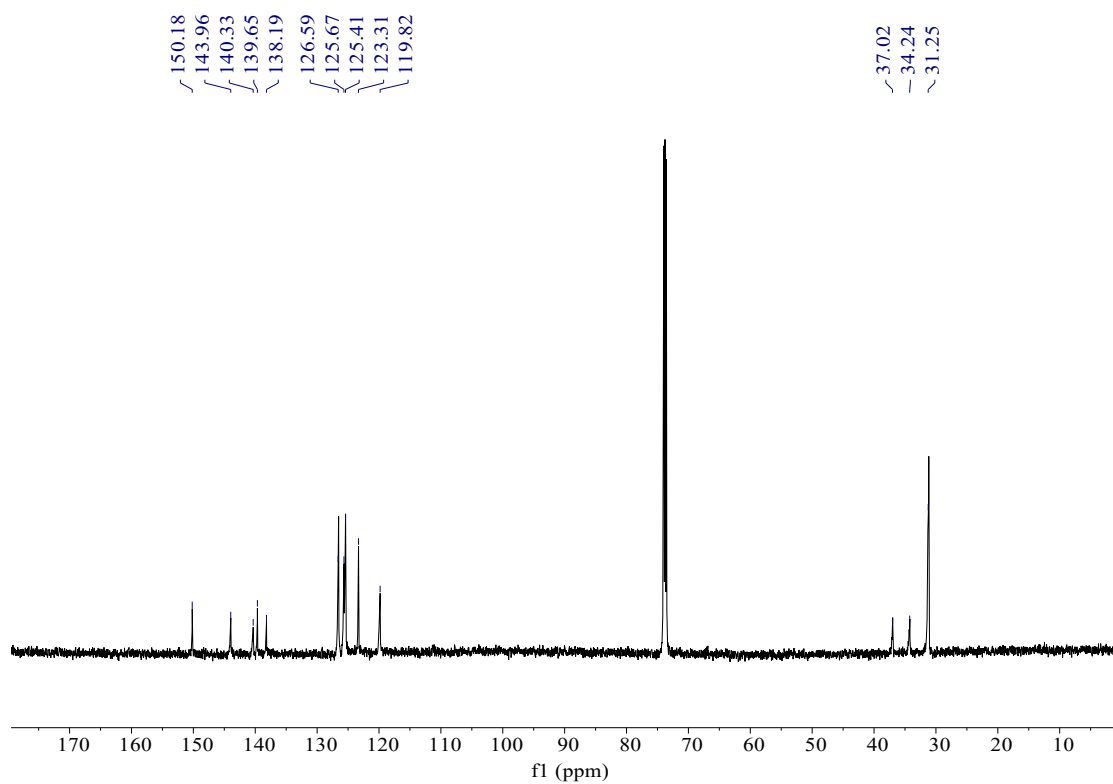

**<sup>1</sup>H and <sup>13</sup>C NMR of 2,7-bis(4-<sup>t</sup>butylphenyl)fluorene (2)**

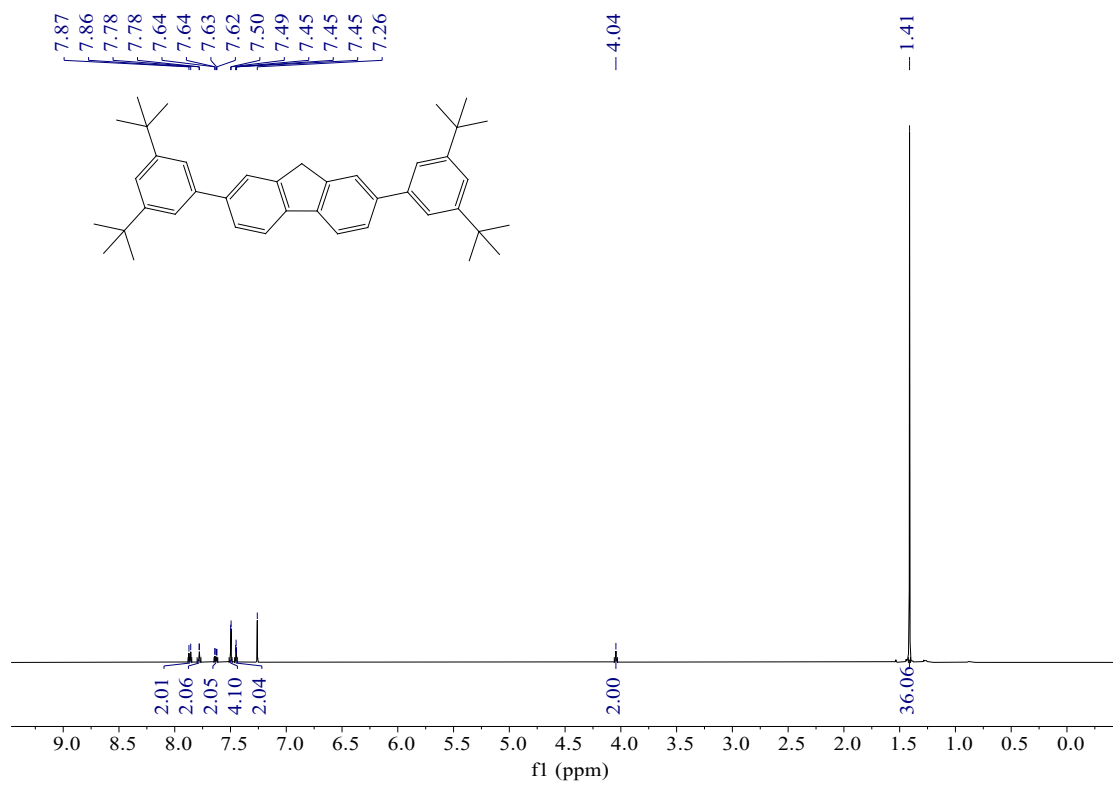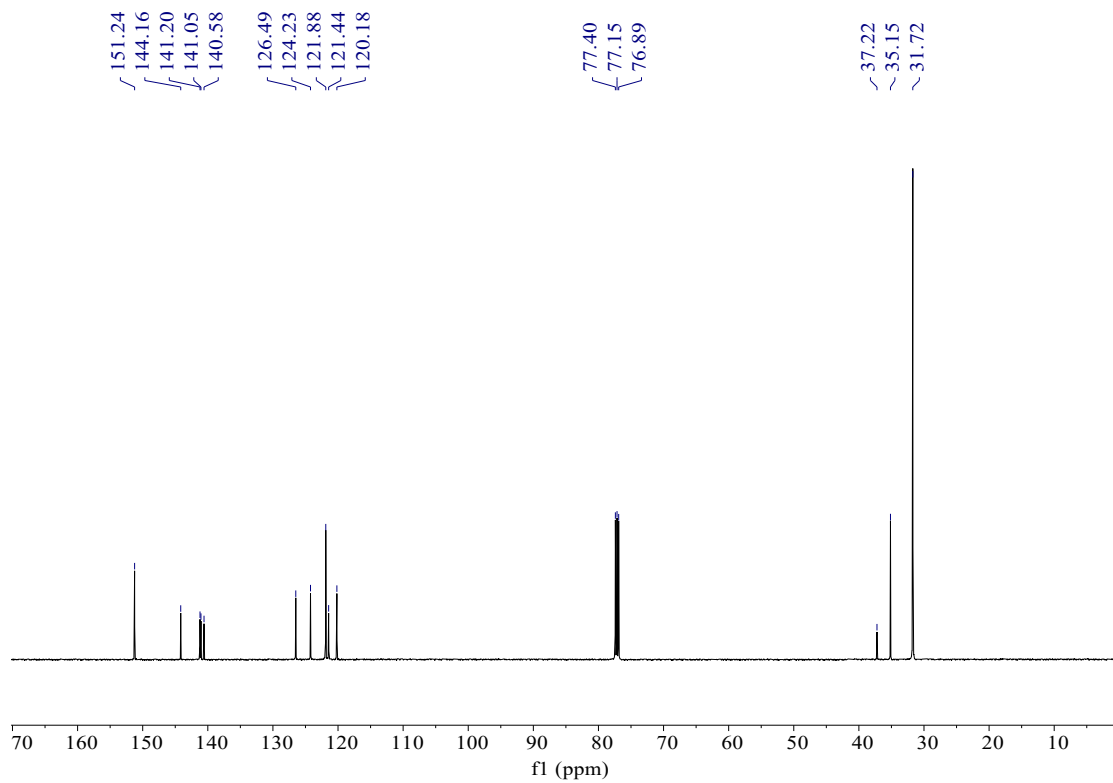

**<sup>1</sup>H and <sup>13</sup>C NMR of 2,7-bis(3,5-di<sup>t</sup>butylphenyl)fluorene (3)**

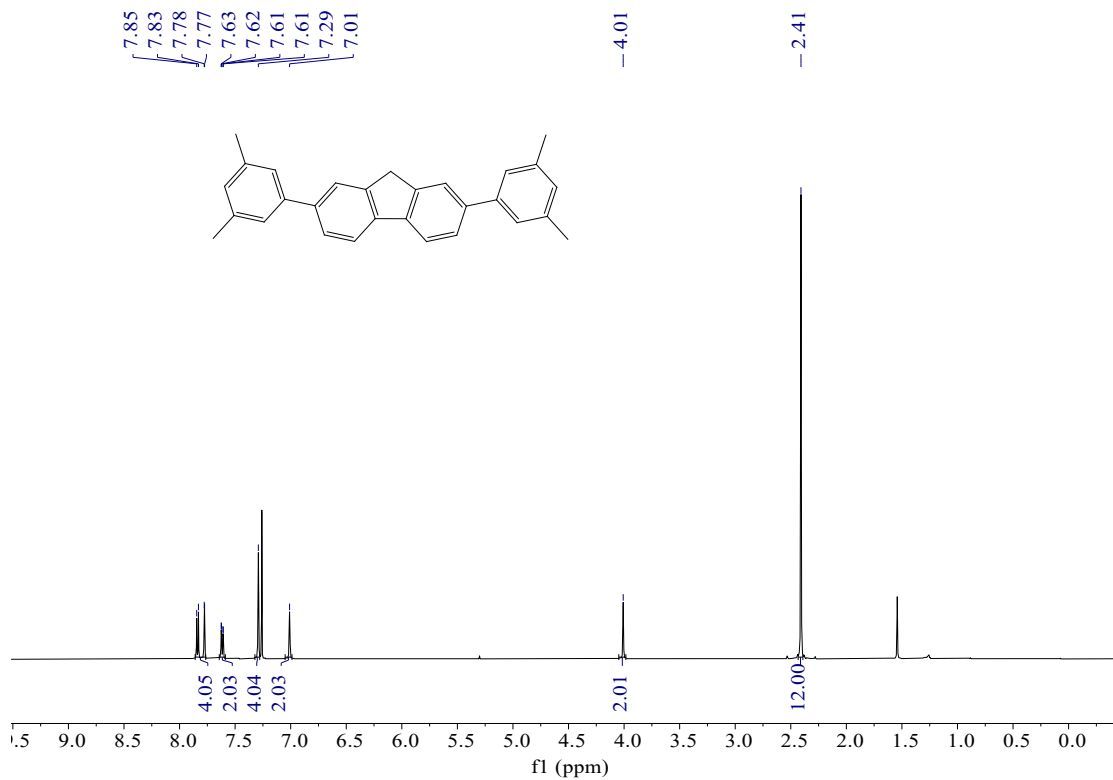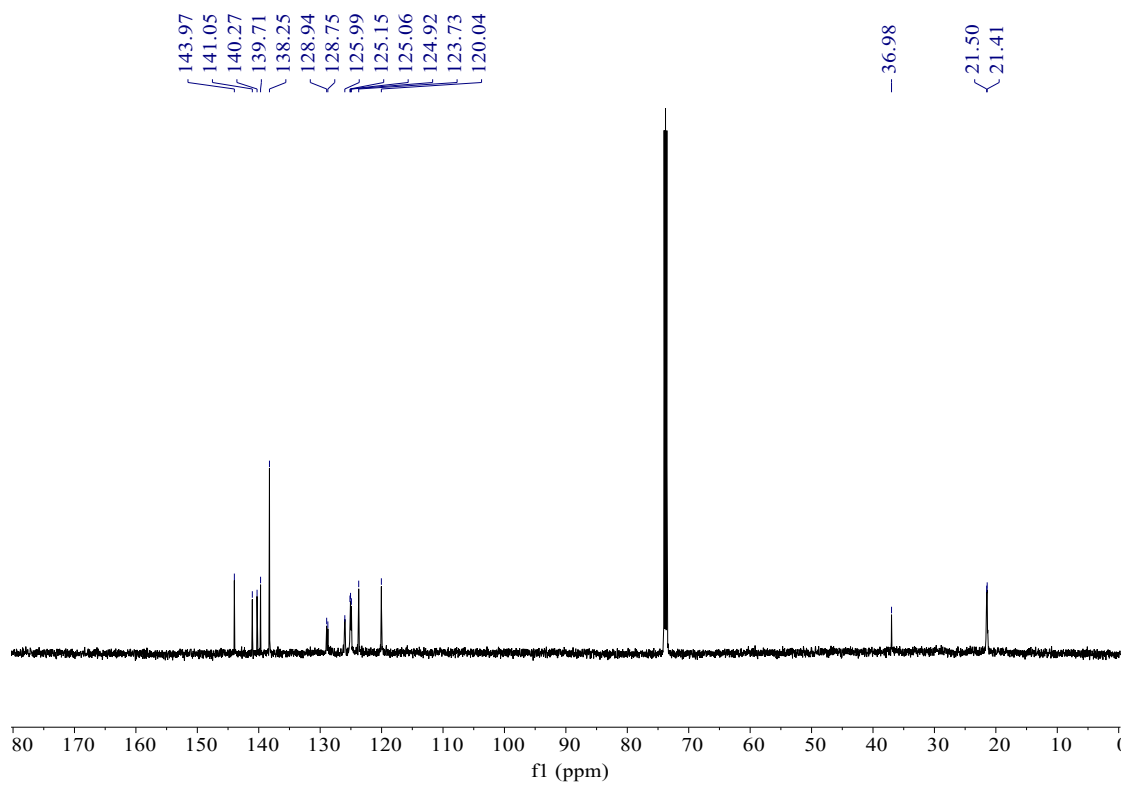

**<sup>1</sup>H and <sup>13</sup>C NMR of 2,7-bis(3,5-dimethylphenyl)fluorene (4)**

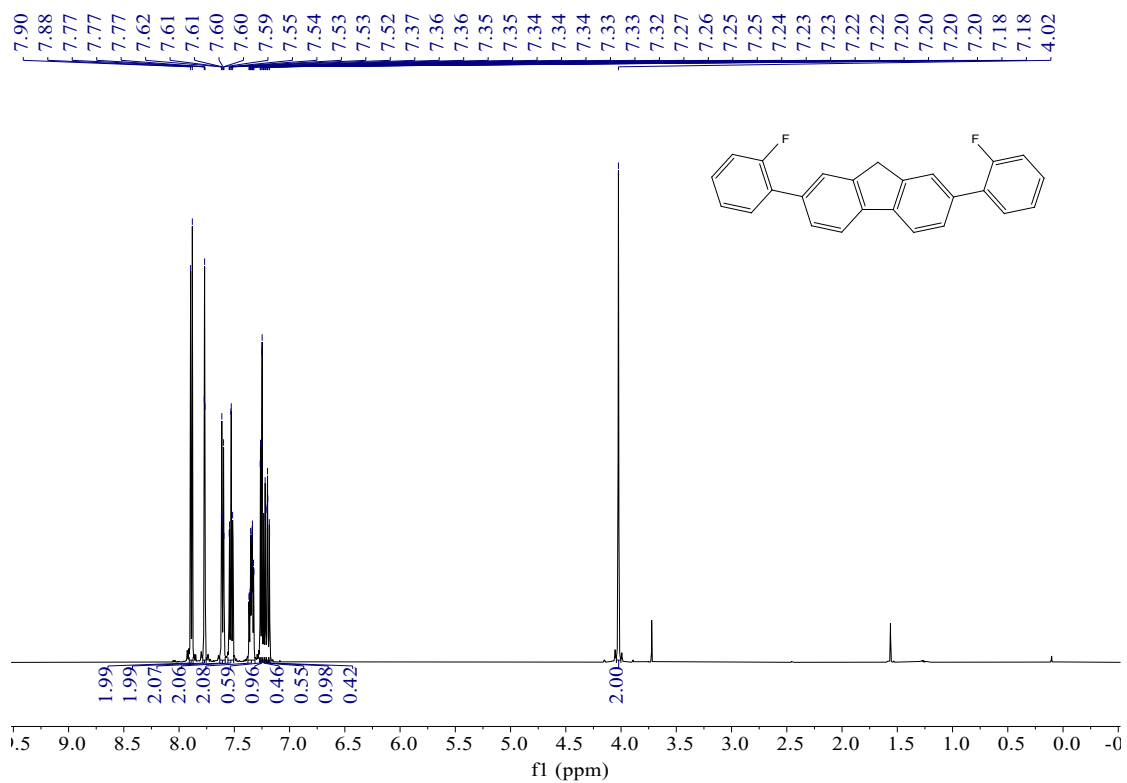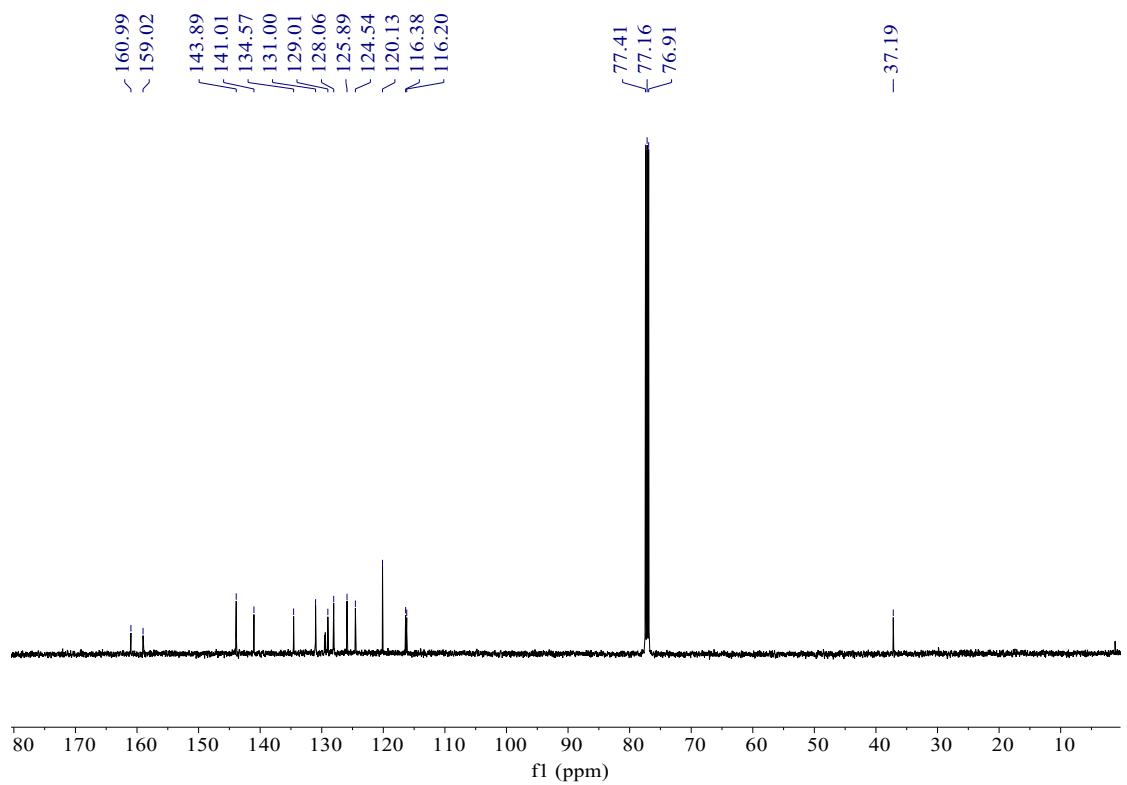

**<sup>1</sup>H and <sup>13</sup>C NMR of 2,7-bis(2-fluorophenyl)fluorene (5)**



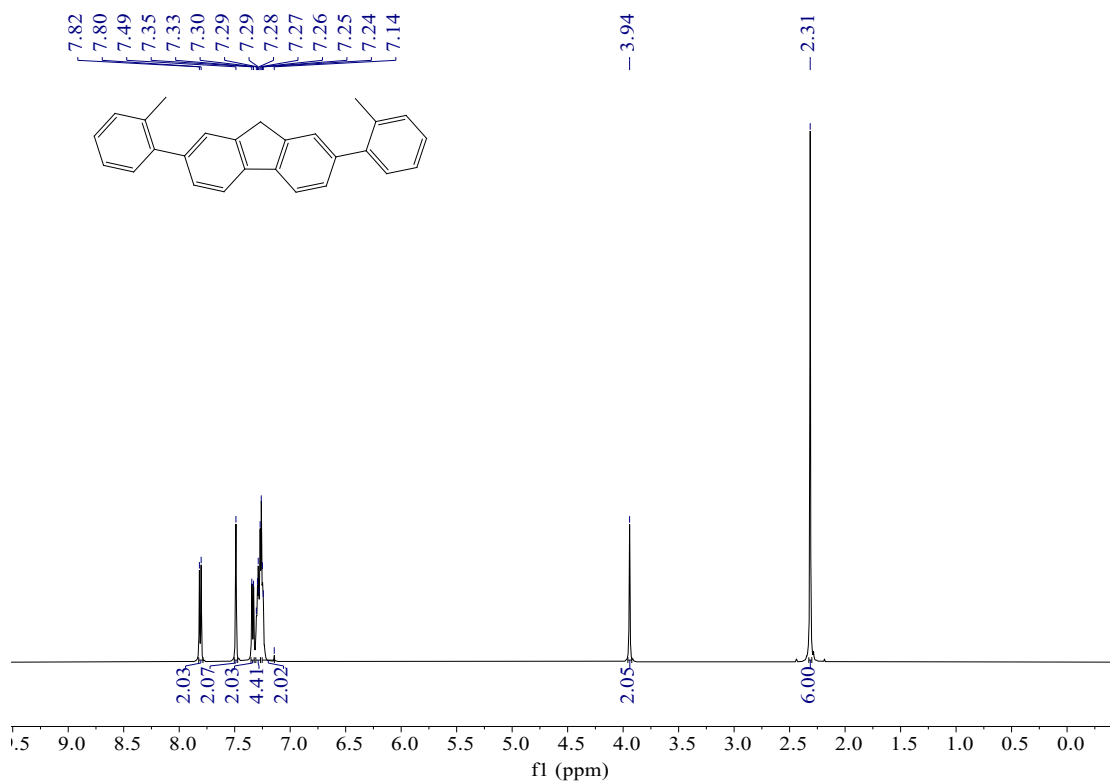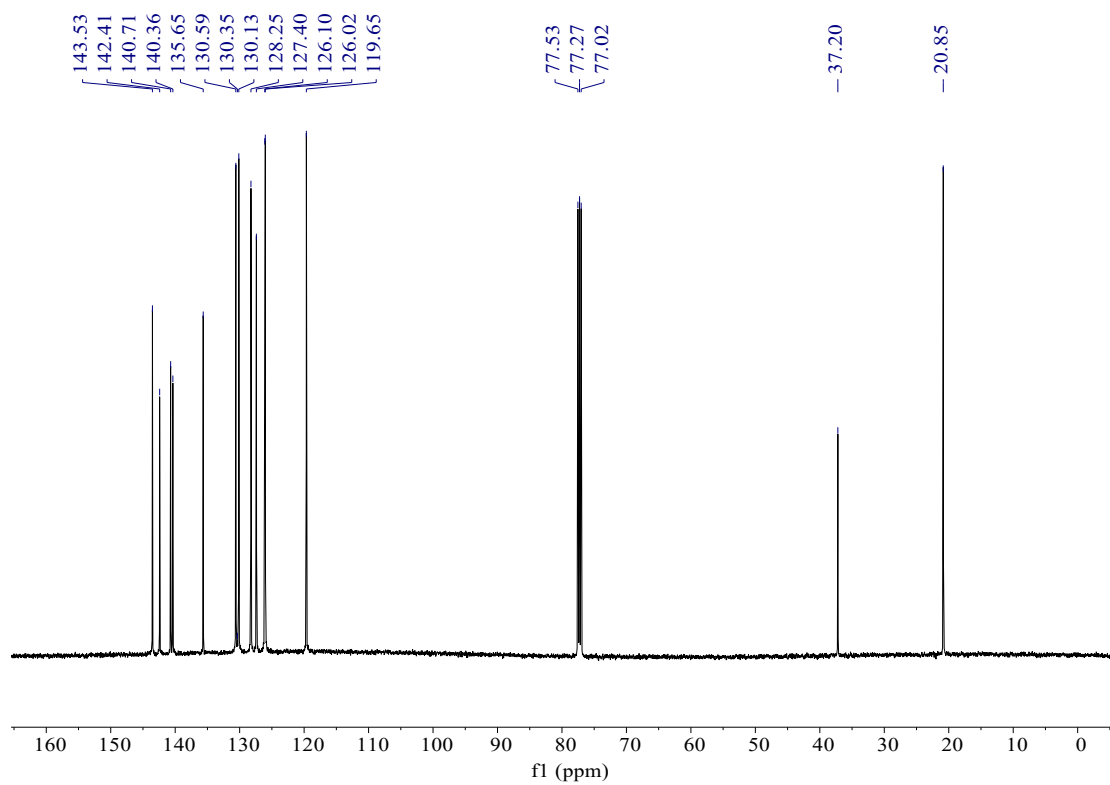

**<sup>1</sup>H and <sup>13</sup>C NMR of 2,7-bis(2-methylphenyl)fluorene (6)**

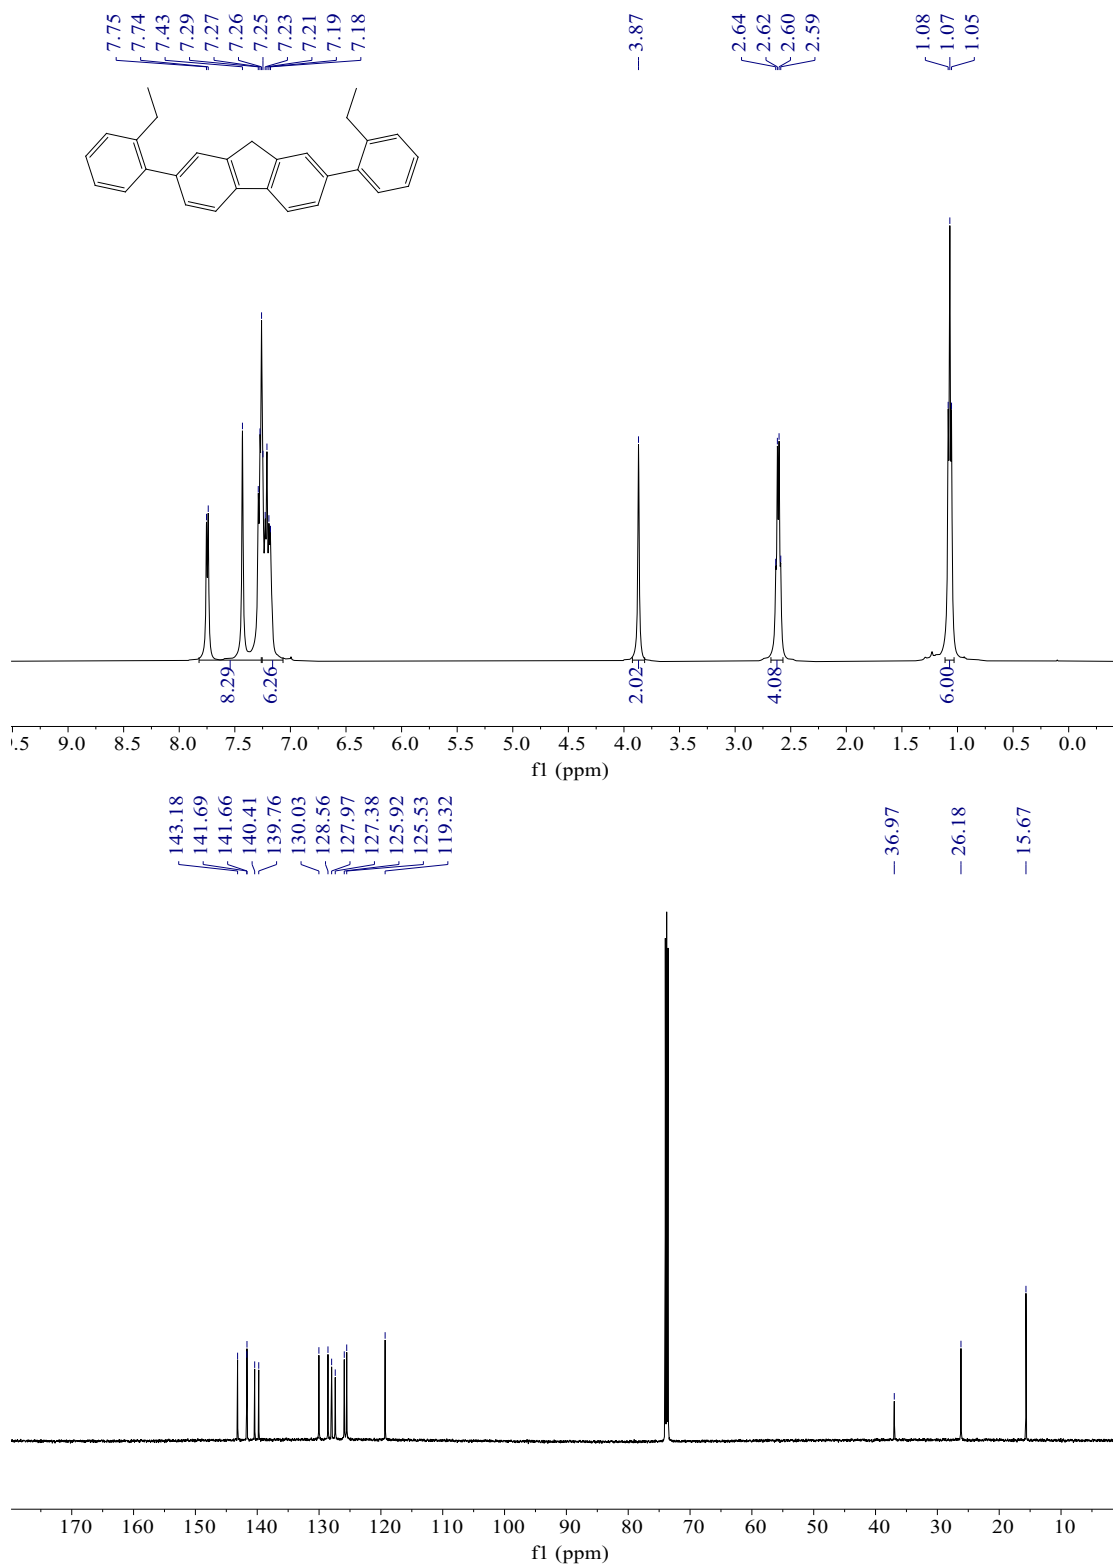

**<sup>1</sup>H and <sup>13</sup>C NMR of 2,7-bis(2-ethylphenyl)fluorene (7)**

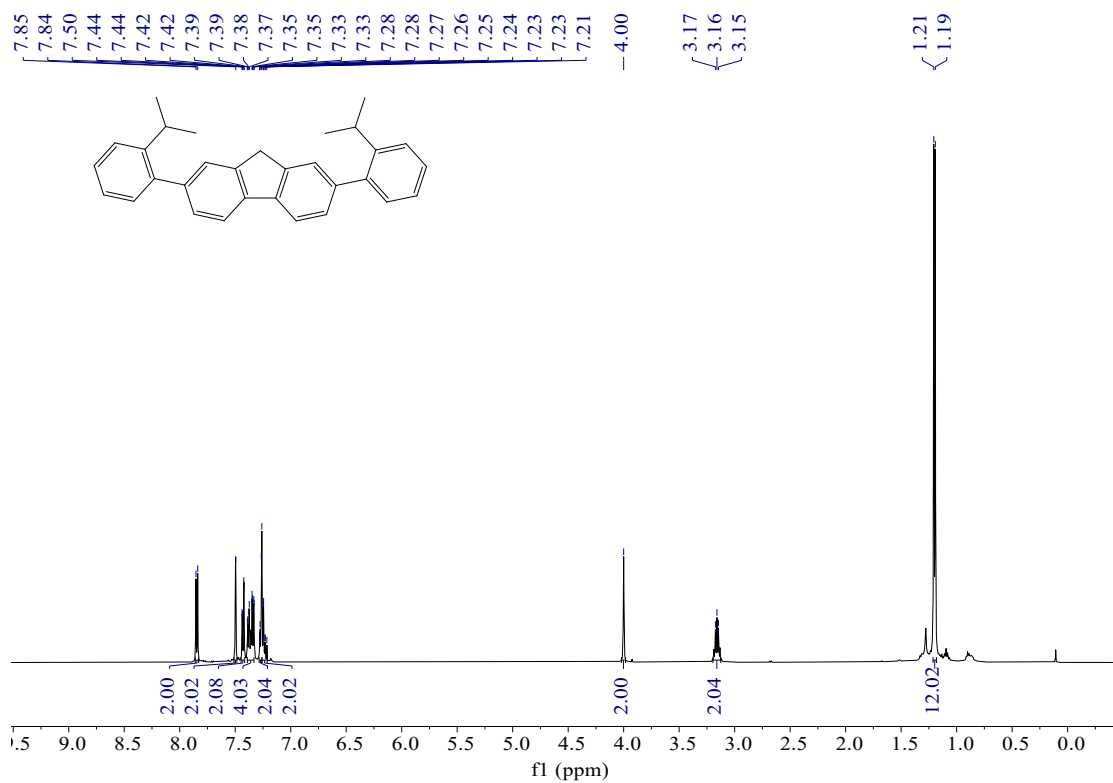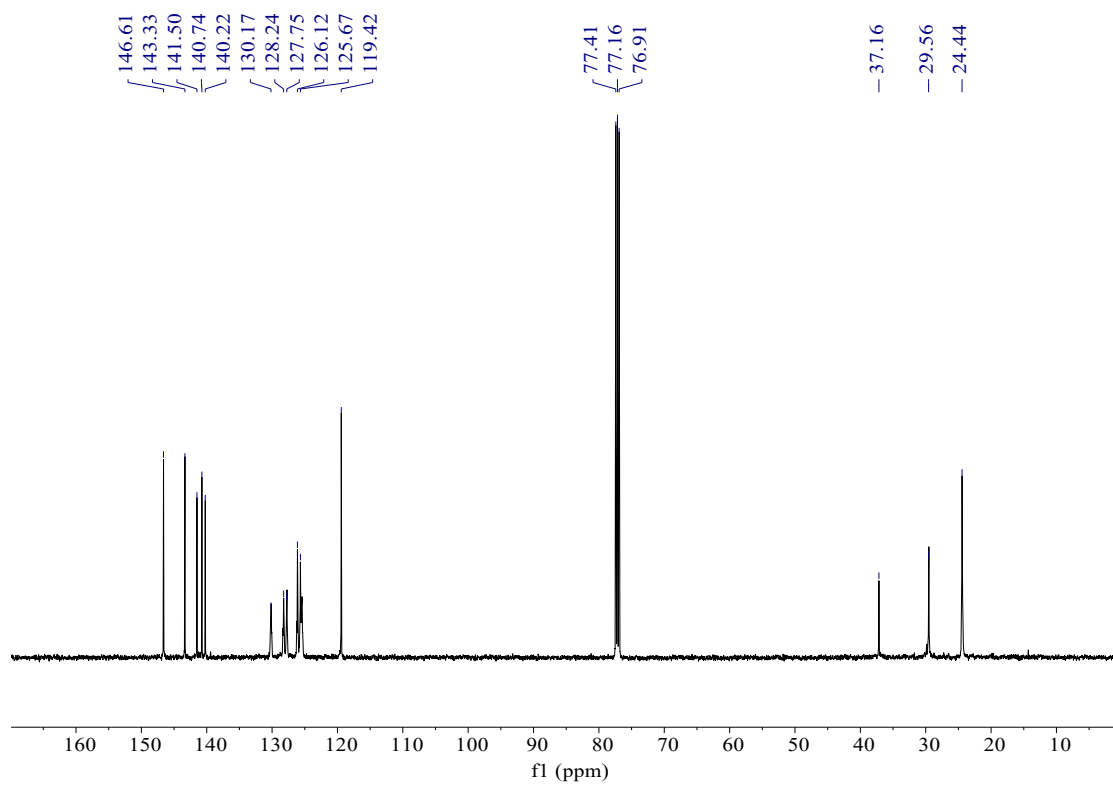

**<sup>1</sup>H and <sup>13</sup>C NMR of 2,7-bis(2-<sup>iso</sup>propylphenyl)fluorene (8)**

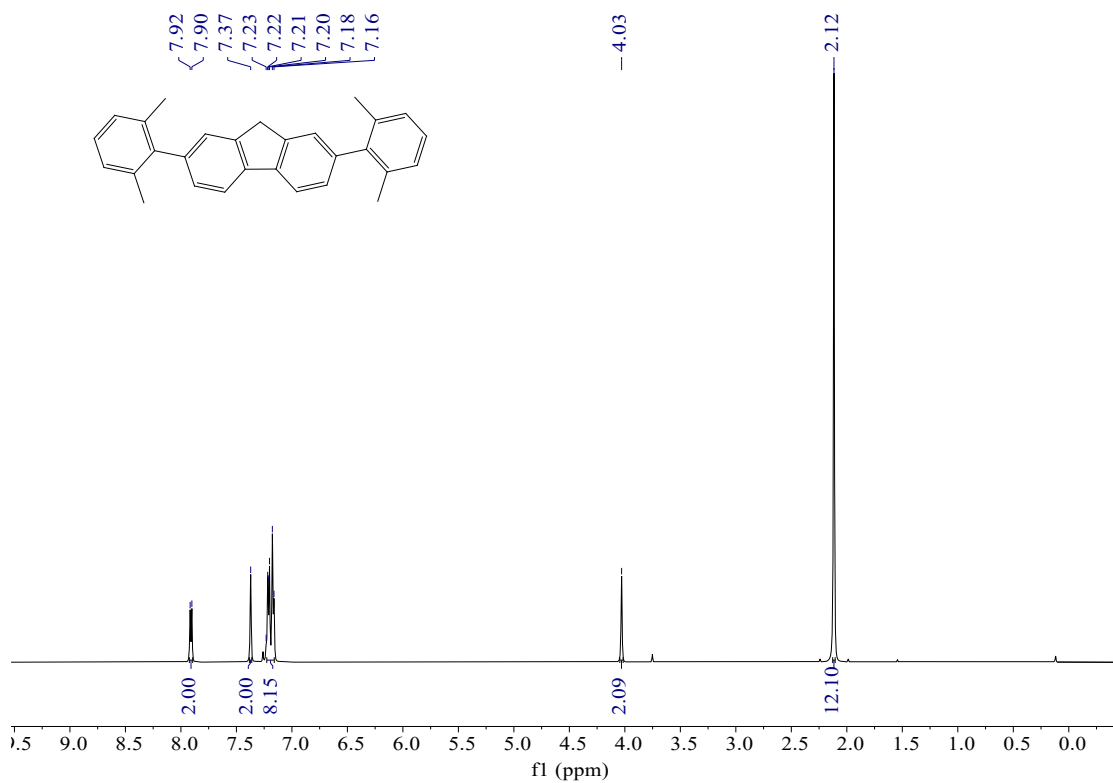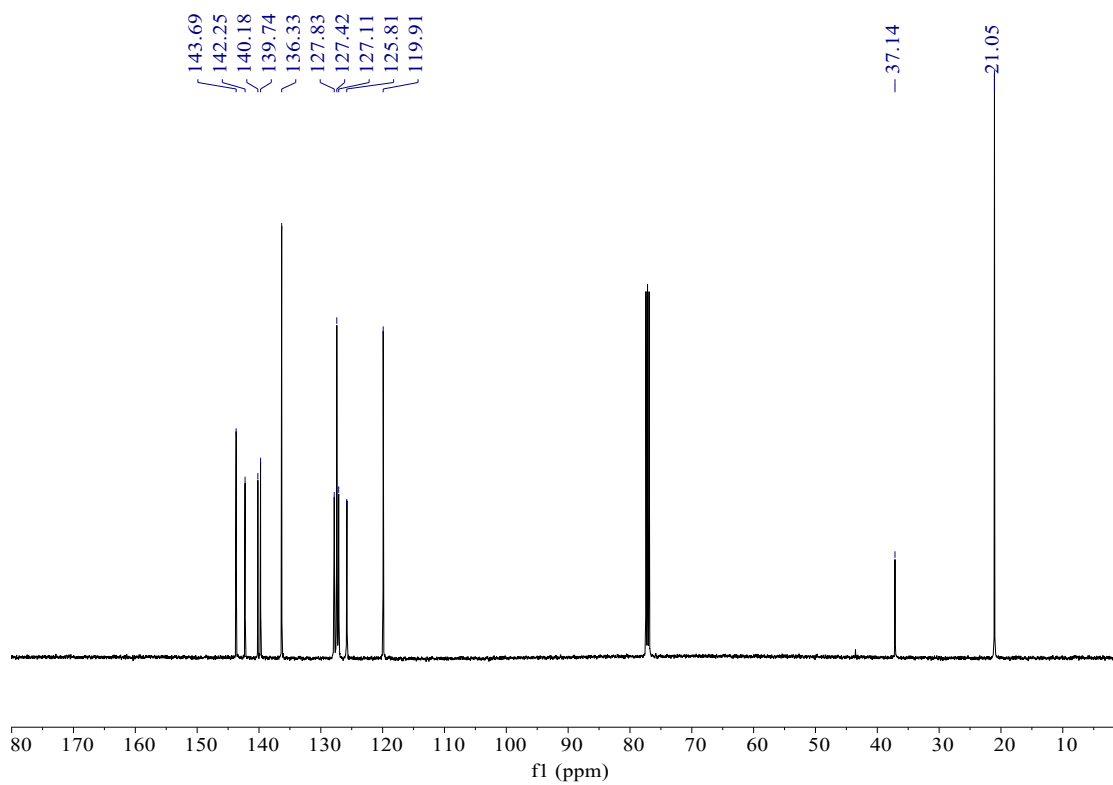

**<sup>1</sup>H and <sup>13</sup>C NMR of 2,7-bis(2,6-dimethylphenyl)fluorene (9)**

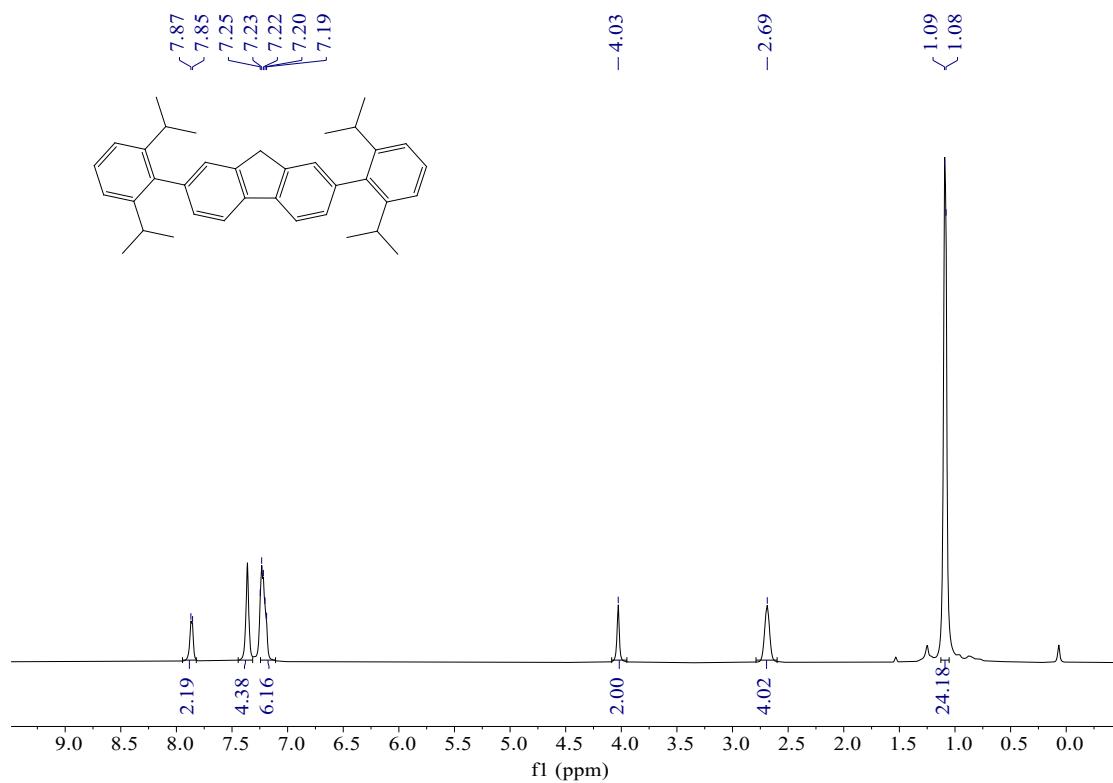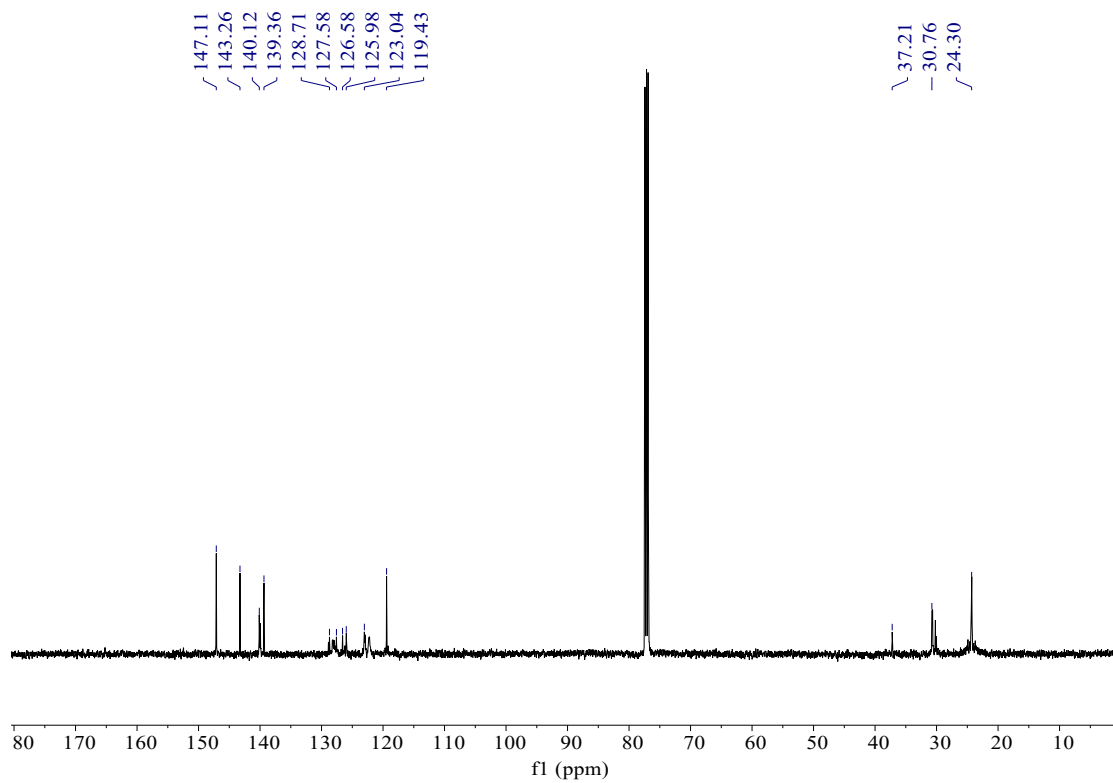

**<sup>1</sup>H and <sup>13</sup>C NMR of 2,7-bis(2,6-di<sup>iso</sup>propylphenyl)fluorene (10)**

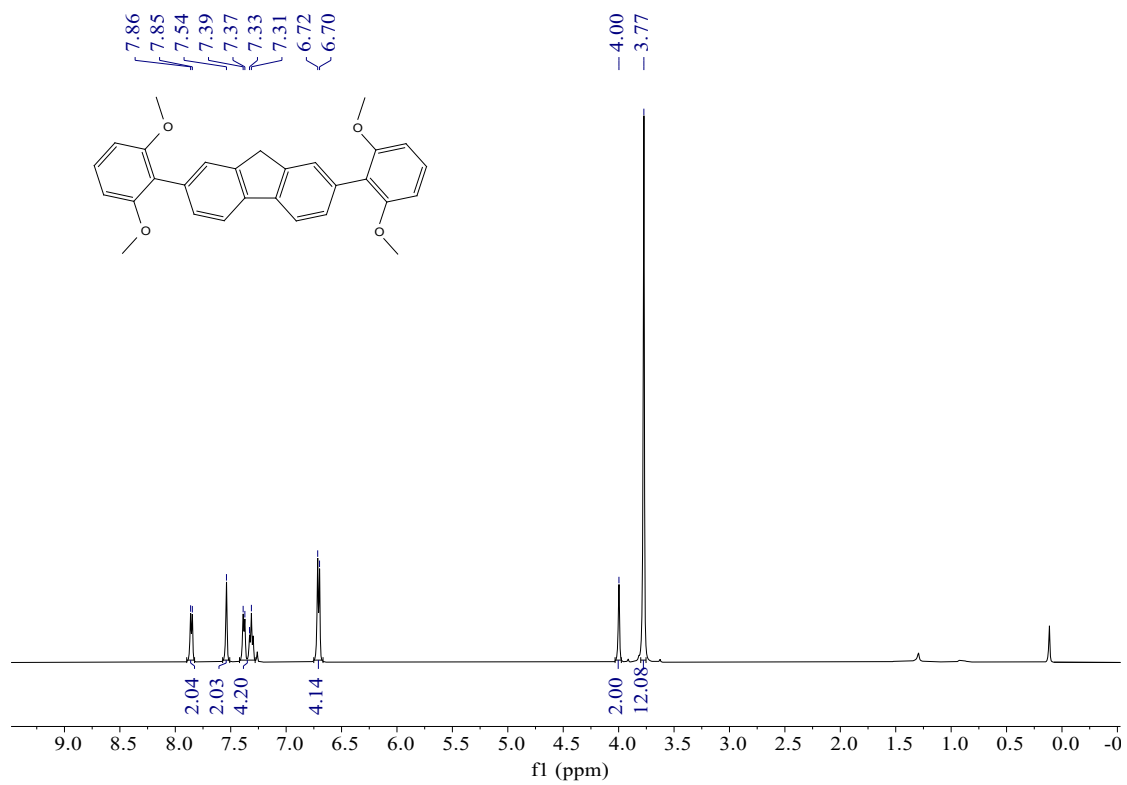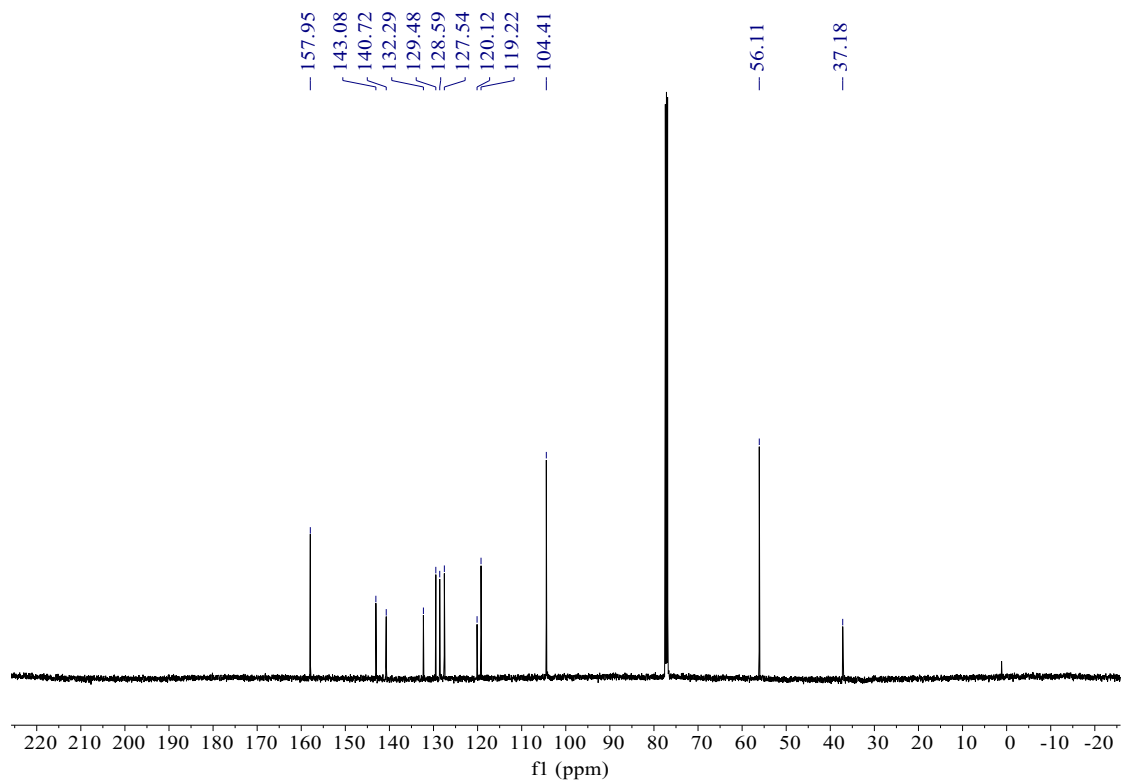

**<sup>1</sup>H and <sup>13</sup>C NMR of 2,7-bis(2,6-dimethoxyphenyl)fluorene (11)**

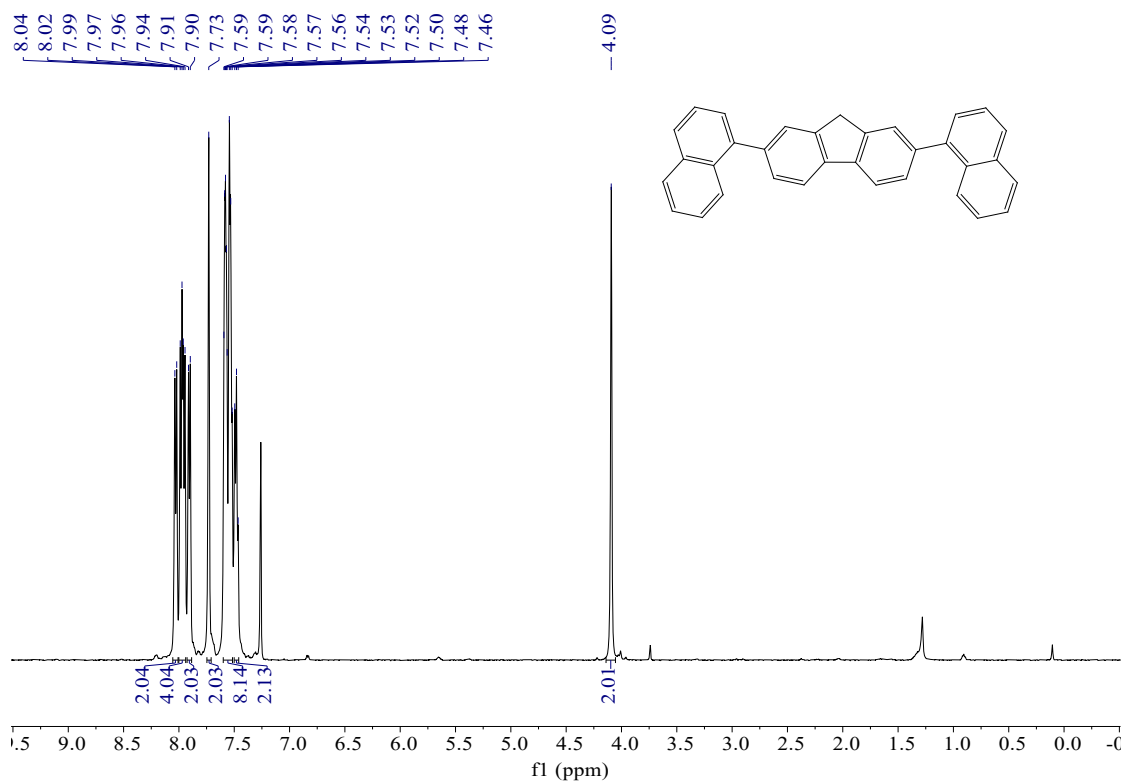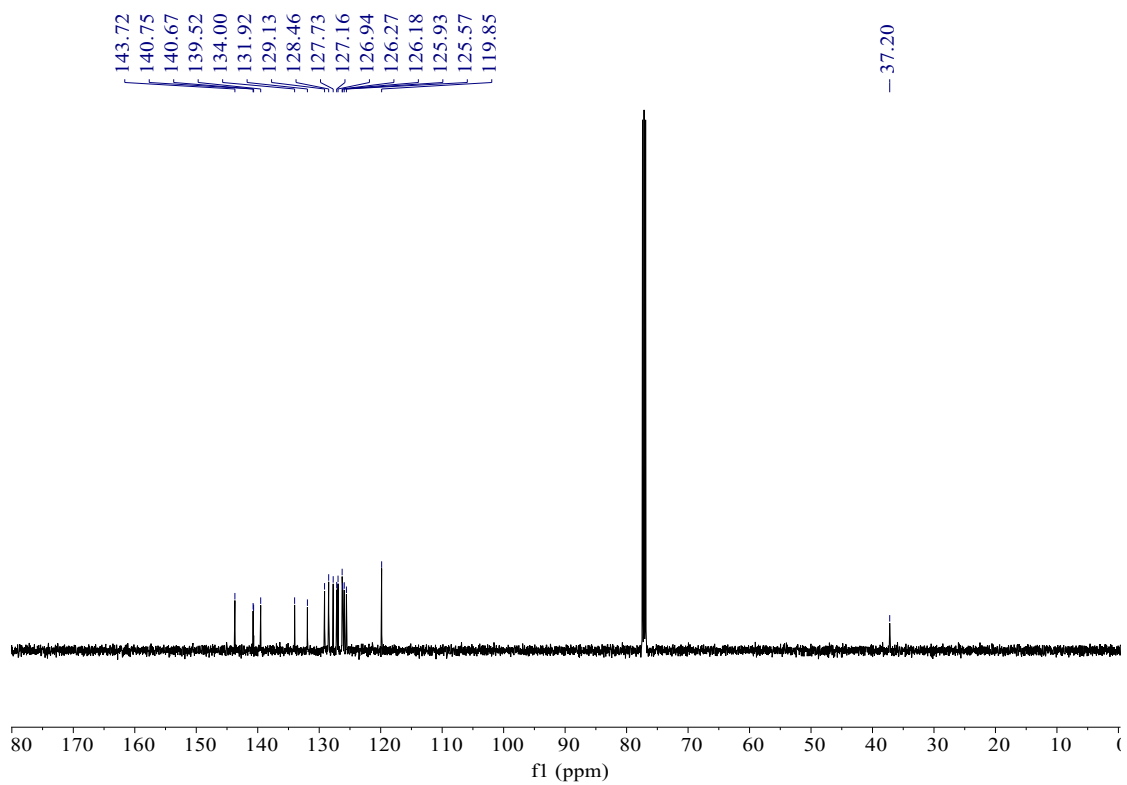

**<sup>1</sup>H and <sup>13</sup>C NMR of 2,7-di(naphthalen-1-yl)fluorene (12)**

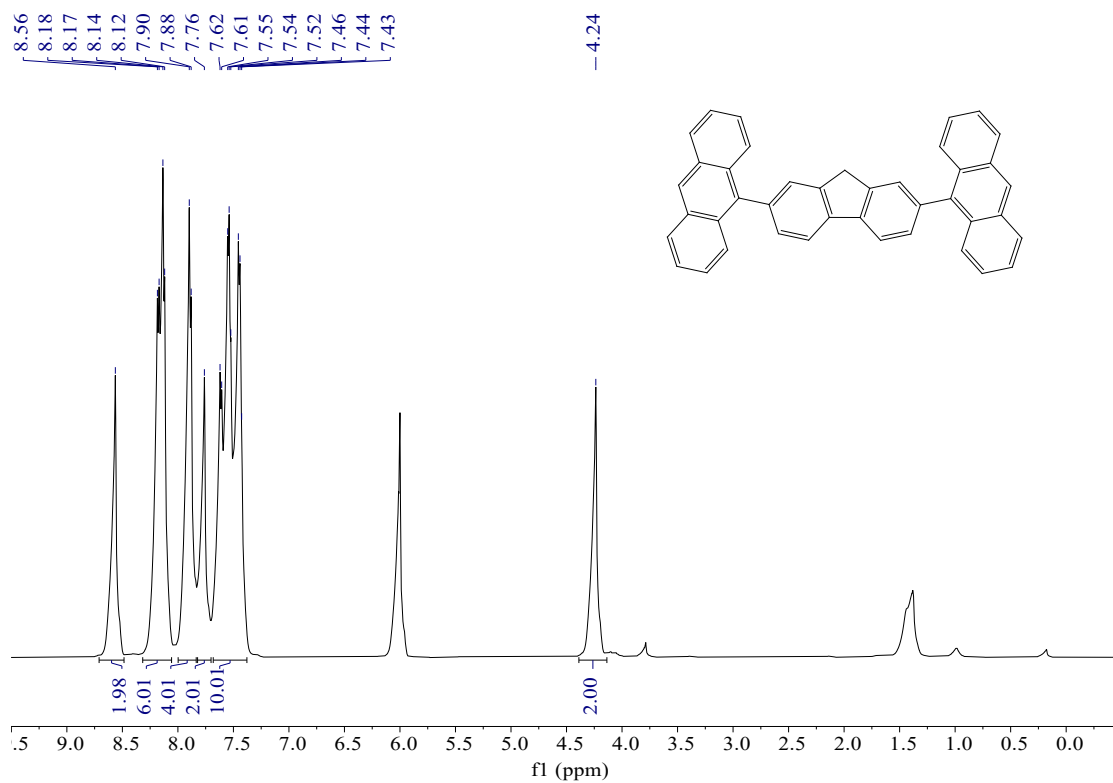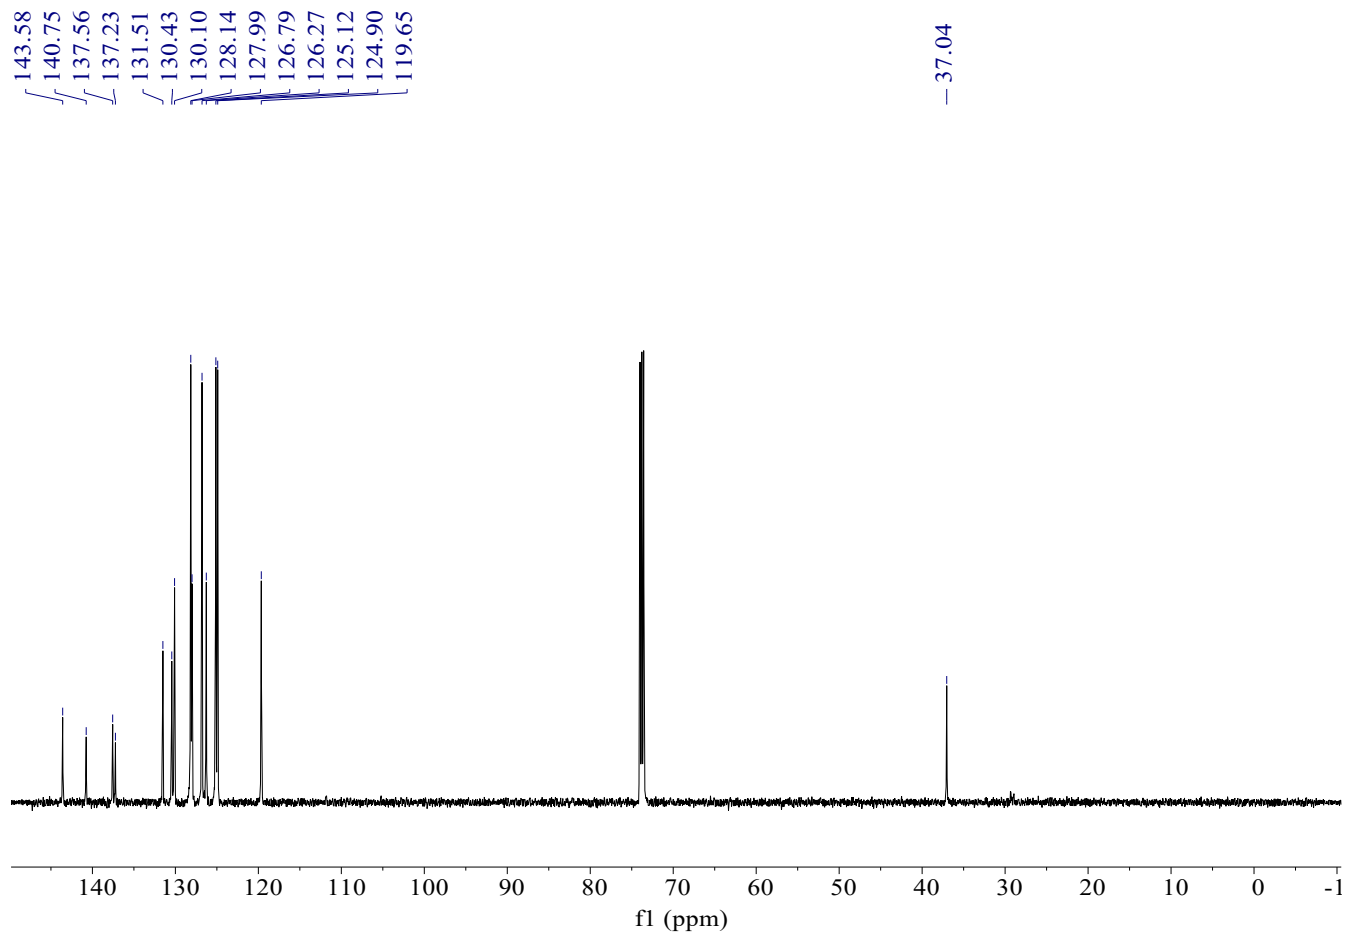

$^1\text{H}$  and  $^{13}\text{C}$  NMR of 2,7-bis(9-anthracenyl)fluorene (13)



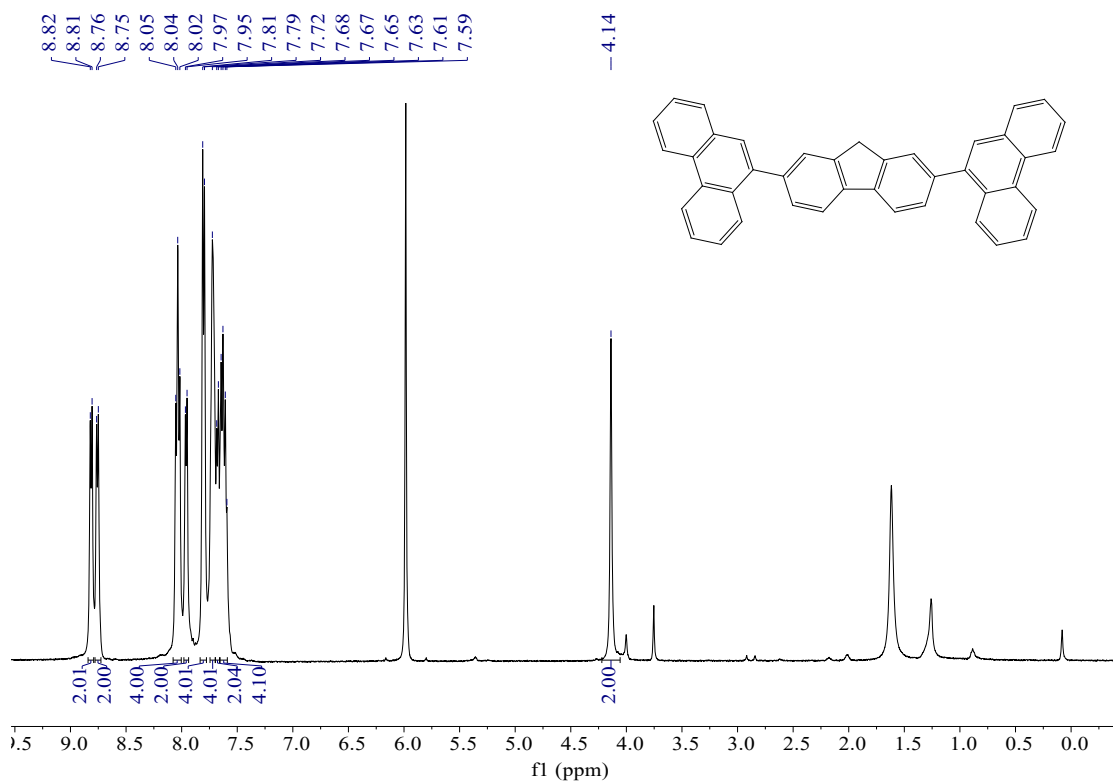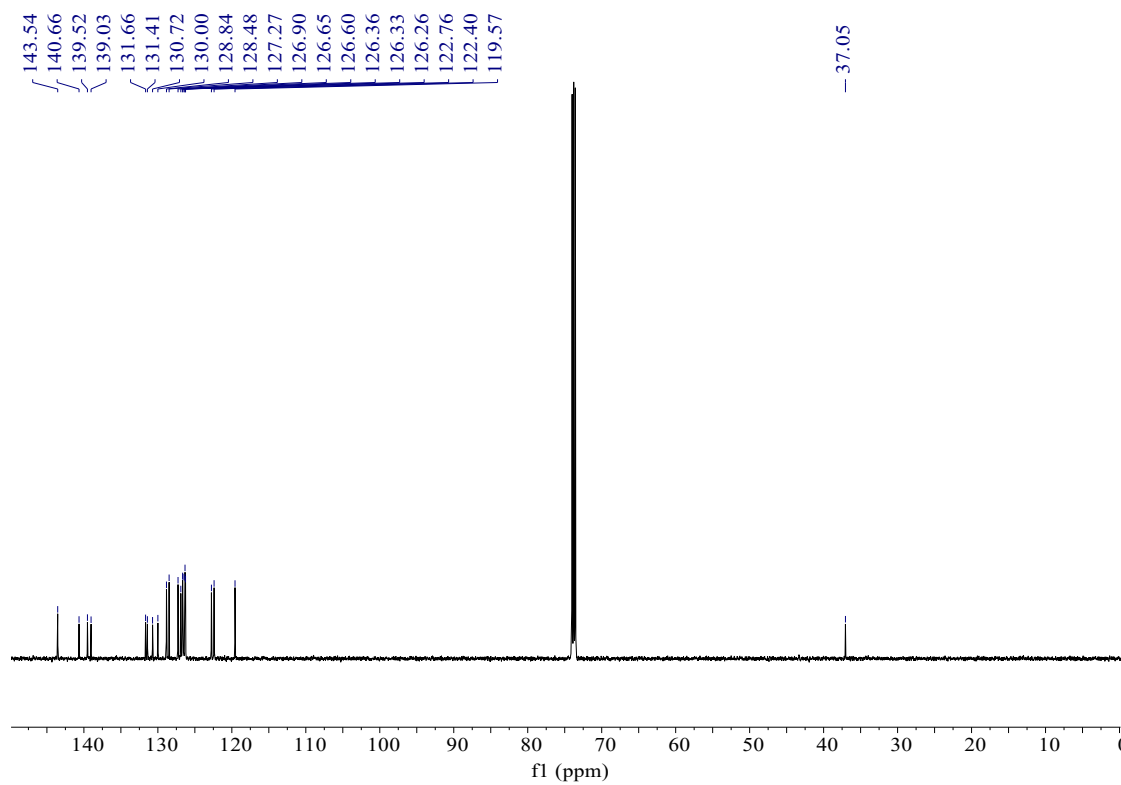

**<sup>1</sup>H and <sup>13</sup>C NMR of 2,7-bis(9-phenanthrenyl)fluorene (14)**

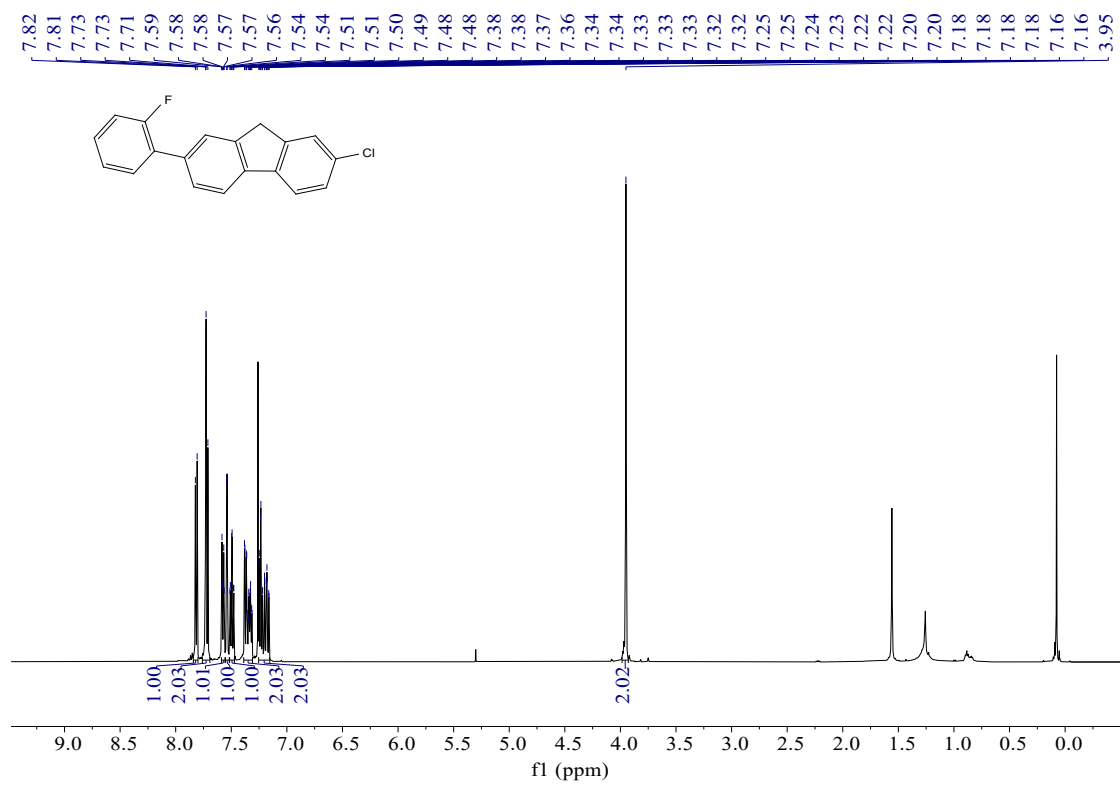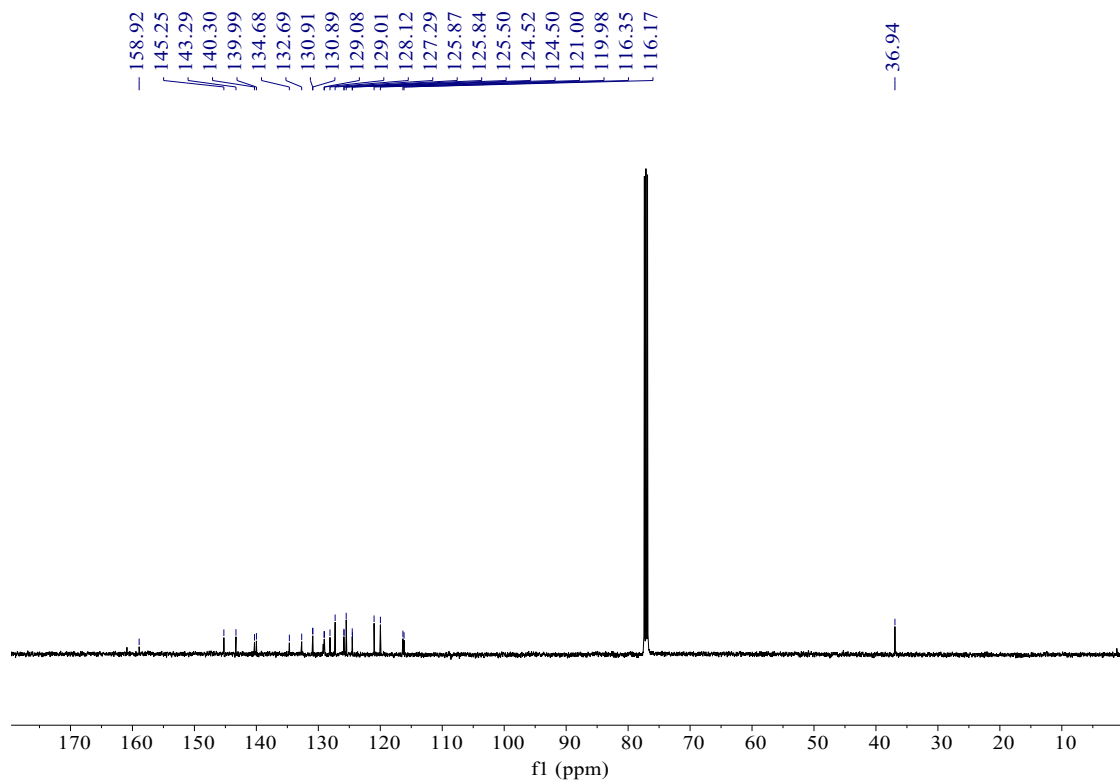

**<sup>1</sup>H and <sup>13</sup>C NMR of 2-Chloro-7-(2-fluorophenyl)-fluorene (15)**

## 6. HRMS analysis reports for the compounds

### Elemental Composition Report

Page 1

#### Single Mass Analysis

Tolerance = 5.0 mDa / DBE: min = -1.5, max = 50.0

Element prediction: Off

Number of isotope peaks used for i-FIT = 3

Monoisotopic Mass, Even Electron Ions

3 formula(e) evaluated with 1 results within limits (up to 50 best isotopic matches for each mass)

Elements Used:

C: 0-25 H: 0-19 B: 0-1 Na: 0-1

20240120-1-4-Pos 130 (0.529)

1: TOF MS ES+

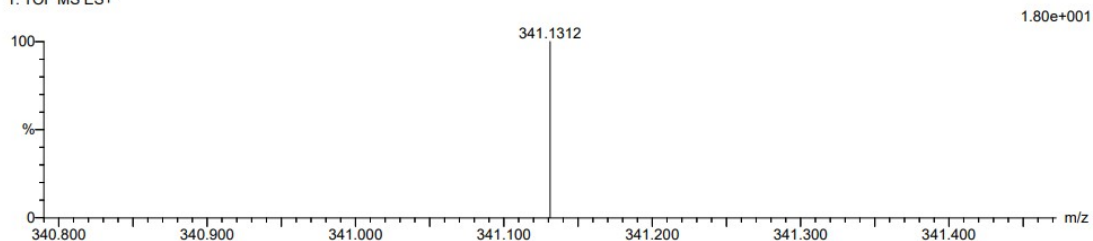

Minimum: -1.5  
Maximum: 5.0 10.0 50.0

| Mass     | Calc. Mass | mDa | PPM | DBE  | i-FIT | Norm | Conf (%) | Formula    |
|----------|------------|-----|-----|------|-------|------|----------|------------|
| 341.1312 | 341.1306   | 0.6 | 1.8 | 16.5 | 12.8  | n/a  | n/a      | C25 H18 Na |

### HRMS (ESI) spectra of 1

### Elemental Composition Report

Page 1

#### Single Mass Analysis

Tolerance = 5.0 mDa / DBE: min = -1.5, max = 50.0

Element prediction: Off

Number of isotope peaks used for i-FIT = 3

Monoisotopic Mass, Even Electron Ions

7 formula(e) evaluated with 1 results within limits (up to 50 best isotopic matches for each mass)

Elements Used:

C: 0-33 H: 0-35 B: 0-1 Na: 0-1

20240120-1-8-Pos 125 (0.505)

1: TOF MS ES+

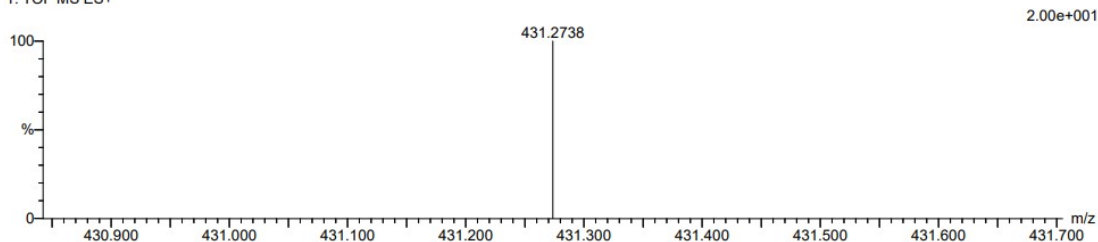

Minimum: -1.5  
Maximum: 5.0 10.0 50.0

| Mass     | Calc. Mass | mDa  | PPM  | DBE  | i-FIT | Norm | Conf (%) | Formula |
|----------|------------|------|------|------|-------|------|----------|---------|
| 431.2738 | 431.2739   | -0.1 | -0.2 | 16.5 | 14.1  | n/a  | n/a      | C33 H35 |

### HRMS (ESI) spectra of 2

## Elemental Composition Report

Page 1

### Single Mass Analysis

Tolerance = 5.0 mDa / DBE: min = -1.5, max = 50.0

Element prediction: Off

Number of isotope peaks used for i-FIT = 3

Monoisotopic Mass, Even Electron Ions

3 formula(e) evaluated with 1 results within limits (up to 50 best isotopic matches for each mass)

Elements Used:

C: 0-29 H: 0-27 B: 0-1 Na: 0-1

20240120-1-1-Pos 102 (0.418)

1: TOF MS ES+

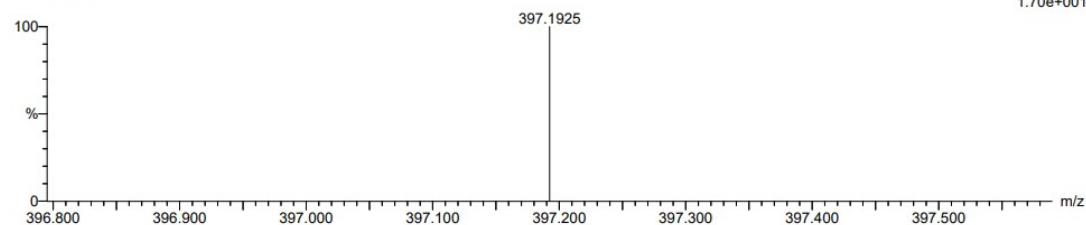

Minimum: -1.5  
Maximum: 50.0

| Mass     | Calc. Mass | mDa  | PPM  | DBE  | i-FIT | Norm | Conf (%) | Formula    |
|----------|------------|------|------|------|-------|------|----------|------------|
| 397.1925 | 397.1932   | -0.7 | -1.8 | 16.5 | 13.2  | n/a  | n/a      | C29 H26 Na |

## HRMS (ESI) spectra of 3

### Elemental Composition Report

Page 1

#### Single Mass Analysis

Tolerance = 5.0 mDa / DBE: min = -1.5, max = 50.0

Element prediction: Off

Number of isotope peaks used for i-FIT = 3

Monoisotopic Mass, Even Electron Ions

3 formula(e) evaluated with 1 results within limits (up to 50 best isotopic matches for each mass)

Elements Used:

C: 0-41 H: 0-55 B: 0-1 Na: 0-1

20240120-1-10-Pos 251 (0.999)

1: TOF MS ES+

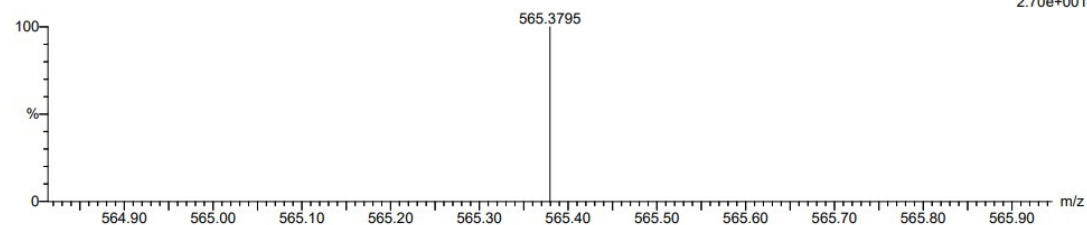

Minimum: -1.5  
Maximum: 50.0

| Mass     | Calc. Mass | mDa  | PPM  | DBE  | i-FIT | Norm | Conf (%) | Formula    |
|----------|------------|------|------|------|-------|------|----------|------------|
| 565.3795 | 565.3810   | -1.5 | -2.7 | 16.5 | 15.8  | n/a  | n/a      | C41 H50 Na |

## HRMS (ESI) spectra of 4

## Single Mass Analysis

Tolerance = 5.0 mDa / DBE: min = -1.5, max = 50.0

Element prediction: Off

Number of isotope peaks used for i-FIT = 3

Monoisotopic Mass, Even Electron Ions

7 formula(e) evaluated with 1 results within limits (up to 50 best isotopic matches for each mass)

Elements Used:

C: 0-25 H: 0-17 B: 0-1 Na: 0-1 F: 0-2

20240120-1-9-Pos 107 (0.437)

1: TOF MS ES+

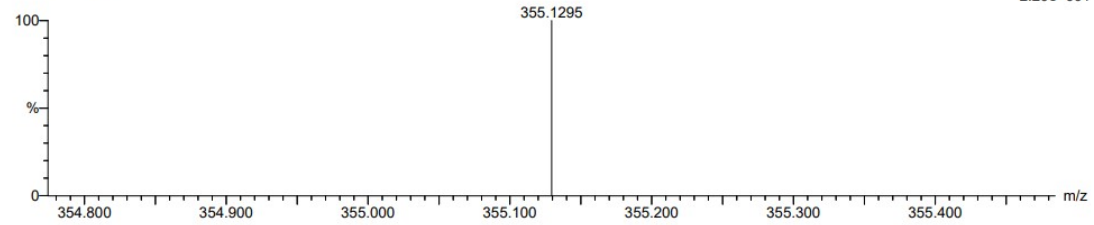

Minimum: -1.5  
Maximum: 50.0

| Mass     | Calc. Mass | mDa  | PPM  | DBE  | i-FIT | Norm | Conf (%) | Formula    |
|----------|------------|------|------|------|-------|------|----------|------------|
| 355.1295 | 355.1298   | -0.3 | -0.8 | 16.5 | 13.4  | n/a  | n/a      | C25 H17 F2 |

## HRMS (ESI) spectra of 5

National Center for Organic Mass Spectrometry in Shanghai  
Shanghai Institute of Organic Chemistry  
Chinese Academic of Sciences  
High Resolution ESI-MS REPORT

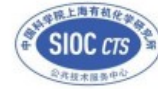

Instrument: Thermo Scientific Q Exactive HF Orbitrap-FTMS

Card Serial Number: E-W2024011504

Sample Serial Number: CF26-1

Operator: Wang HY

Date: 2024/01/15

Operation Mode: AP-MALDI Positive Ion Mode

CF26-1 #62 RT: 0.35 AV: 1 MS: 0.0255  
T: FTMS + p NSI Full ms [20C

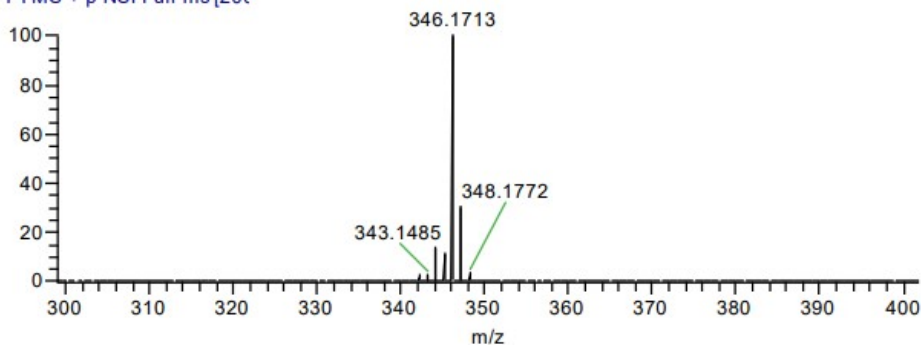

Elemental composition search on mass 346.1713

m/z= 341.1713-351.1713

| m/z      | Theo. Mass | Delta (ppm) | RDB equiv. | Composition                     |
|----------|------------|-------------|------------|---------------------------------|
| 346.1713 | 346.1716   | -0.99       | 17.0       | C <sub>27</sub> H <sub>22</sub> |

## HRMS (ESI) spectra of 6

National Center for Organic Mass Spectrometry in Shanghai  
Shanghai Institute of Organic Chemistry  
Chinese Academic of Sciences  
High Resolution ESI-MS REPORT

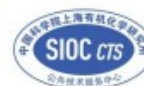

Instrument: Thermo Scientific Q Exactive HF Orbitrap-FTMS

Card Serial Number: E-W2024011503

Sample Serial Number: CF27-1

Operator: Wang HY

Date: 2024/01/15

Operation Mode: AP-MALDI Positive Ion Mode

CF27-1 #69 RT: 0.38 AV: 1 MS: 0.0550  
T: FTMS + p NSI Full ms [200

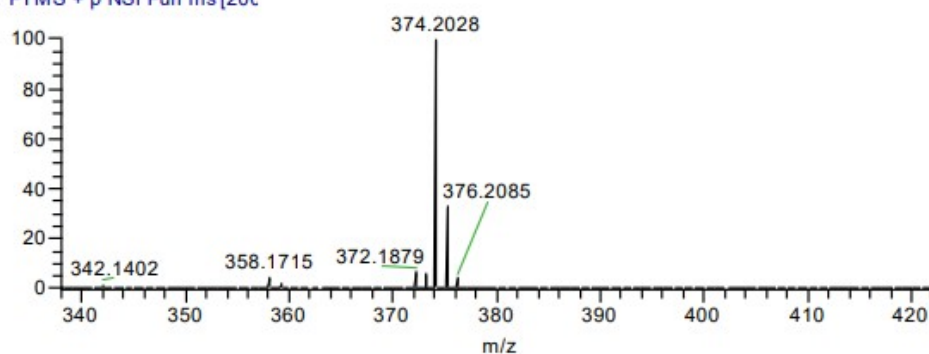

Elemental composition search on mass 374.2028

m/z= 369.2028-379.2028

| m/z      | Theo. Mass | Delta (ppm) | RDB equiv. | Composition                     |
|----------|------------|-------------|------------|---------------------------------|
| 374.2028 | 374.2029   | -0.38       | 17.0       | C <sub>29</sub> H <sub>26</sub> |

## HRMS (ESI) spectra of 7

Instrument: Thermo Scientific Q Exactive HF Orbitrap-FTMS

Card Serial Number: E-W2024011502

Sample Serial Number: CF28-1

Operator: Wang HY

Date: 2024/01/15

Operation Mode: AP-MALDI Positive Ion Mode

CF28-1 #53 RT: 0.29 AV: 1 MS: 60000  
T: FTMS + p NSI Full ms [200

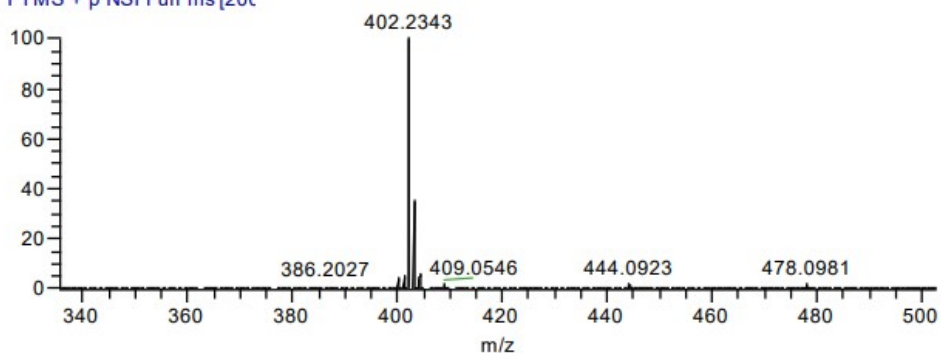

Elemental composition search on mass 402.2343

m/z = 397.2343-407.2343

| m/z      | Theo. Mass | Delta (ppm) | RDB equiv. | Composition                     |
|----------|------------|-------------|------------|---------------------------------|
| 402.2343 | 402.2342   | 0.27        | 17.0       | C <sub>31</sub> H <sub>30</sub> |

## HRMS (ESI) spectra of 8

Instrument: Thermo Scientific Q Exactive HF Orbitrap-FTMS

Card Serial Number: E-W2024011501

Sample Serial Number: CF41-1

Operator: Wang HY

Date: 2024/01/15

Operation Mode: AP-MALDI Positive Ion Mode

CF41-1 #35 RT: 0.18 AV: 1 MS: 2.0056  
 T: FTMS + p NSI Full ms[20C]

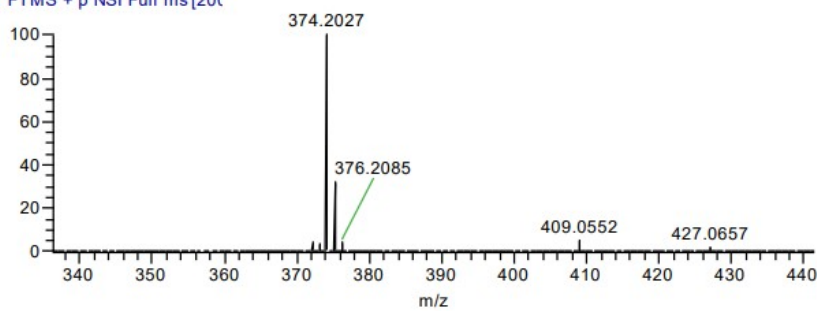

Elemental composition search on mass 374.2027

| m/z      | Theo. Mass | Delta (ppm) | RDB equiv. | Composition                     |
|----------|------------|-------------|------------|---------------------------------|
| 374.2027 | 374.2029   | -0.46       | 17.0       | C <sub>29</sub> H <sub>26</sub> |

## HRMS (ESI) spectra of 9

### Elemental Composition Report

Page 1

#### Single Mass Analysis

Tolerance = 5.0 mDa / DBE: min = -1.5, max = 50.0

Element prediction: Off

Number of isotope peaks used for i-FIT = 3

Monoisotopic Mass, Even Electron Ions

13 formula(e) evaluated with 1 results within limits (up to 50 best isotopic matches for each mass)

Elements Used:

C: 0-29 H: 0-27 B: 0-1 O: 0-4 Na: 0-1

20240120-1-6-Pos 93 (0.384)

1: TOF MS ES+

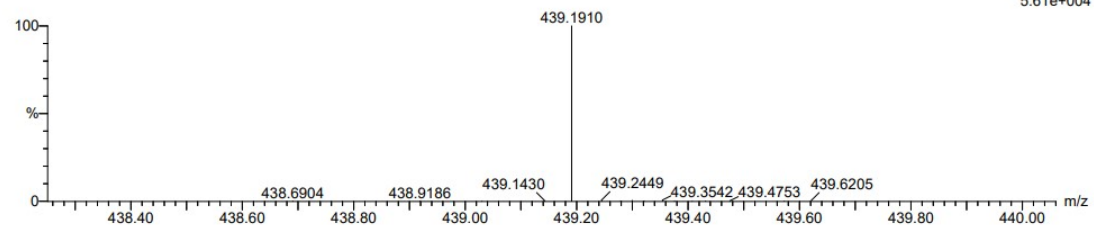

Minimum: -1.5  
 Maximum: 5.0 10.0 50.0

| Mass     | Calc. Mass | mDa | PPM | DBE  | i-FIT | Norm | Conf (%) | Formula                                        |
|----------|------------|-----|-----|------|-------|------|----------|------------------------------------------------|
| 439.1910 | 439.1909   | 0.1 | 0.2 | 16.5 | 129.7 | n/a  | n/a      | C <sub>29</sub> H <sub>27</sub> O <sub>4</sub> |

## HRMS (ESI) spectra of 10



## Elemental Composition Report

Page 1

### Single Mass Analysis

Tolerance = 5.0 mDa / DBE: min = -1.5, max = 50.0

Element prediction: Off

Number of isotope peaks used for i-FIT = 3

Monoisotopic Mass, Even Electron Ions

7 formula(e) evaluated with 1 results within limits (up to 50 best isotopic matches for each mass)

Elements Used:

C: 0-37 H: 0-43 B: 0-1 Na: 0-1

20240120-1-5-Pos 331 (1.314)

1: TOF MS ES+

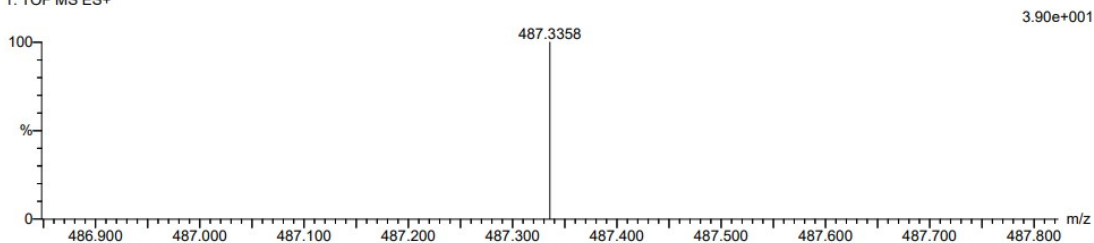

Minimum: -1.5  
Maximum: 5.0 10.0 50.0

| Mass     | Calc. Mass | mDa  | PPM  | DBE  | i-FIT | Norm | Conf (%) | Formula |
|----------|------------|------|------|------|-------|------|----------|---------|
| 487.3358 | 487.3365   | -0.7 | -1.4 | 16.5 | 16.4  | n/a  | n/a      | C37 H43 |

## HRMS (ESI) spectra of 11

### Elemental Composition Report

Page 1

#### Single Mass Analysis

Tolerance = 5.0 mDa / DBE: min = -1.5, max = 50.0

Element prediction: Off

Number of isotope peaks used for i-FIT = 3

Monoisotopic Mass, Even Electron Ions

3 formula(e) evaluated with 1 results within limits (up to 50 best isotopic matches for each mass)

Elements Used:

C: 0-33 H: 0-23 B: 0-1 Na: 0-1

20240120-1-3-Pos 75 (0.310)

1: TOF MS ES+

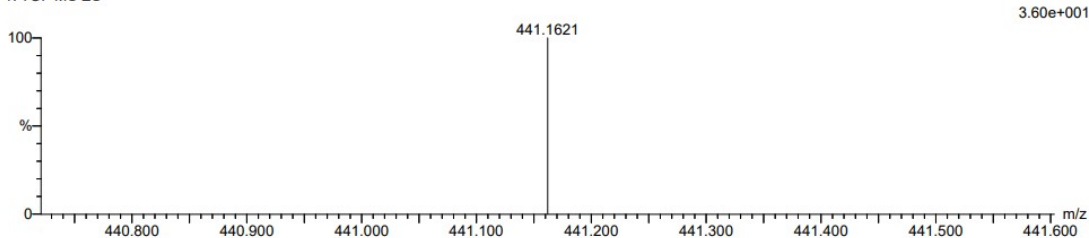

Minimum: -1.5  
Maximum: 5.0 10.0 50.0

| Mass     | Calc. Mass | mDa | PPM | DBE  | i-FIT | Norm | Conf (%) | Formula    |
|----------|------------|-----|-----|------|-------|------|----------|------------|
| 441.1621 | 441.1619   | 0.2 | 0.5 | 22.5 | 15.8  | n/a  | n/a      | C33 H22 Na |

## HRMS (ESI) spectra of 12

## Elemental Composition Report

Page 1

### Single Mass Analysis

Tolerance = 5.0 mDa / DBE: min = -1.5, max = 50.0

Element prediction: Off

Number of isotope peaks used for i-FIT = 3

Monoisotopic Mass, Even Electron Ions

3 formula(e) evaluated with 1 results within limits (up to 50 best isotopic matches for each mass)

Elements Used:

C: 0-41 H: 0-27 B: 0-1 Na: 0-1

20240120-1-11-Pos 60 (0.253)

1: TOF MS ES+

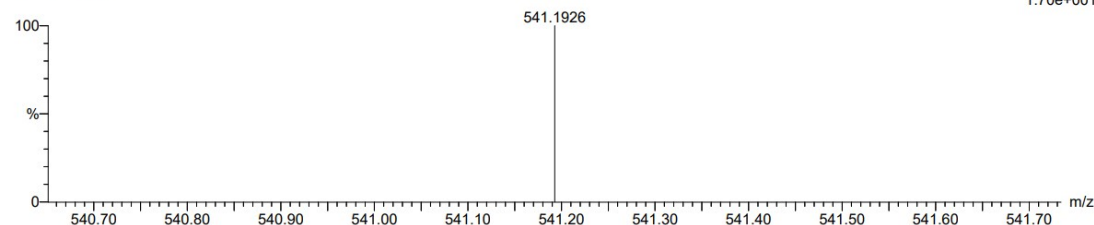

Minimum: -1.5  
Maximum: 5.0 10.0 50.0

| Mass     | Calc. Mass | mDa  | PPM  | DBE  | i-FIT | Norm | Conf (%) | Formula    |
|----------|------------|------|------|------|-------|------|----------|------------|
| 541.1926 | 541.1932   | -0.6 | -1.1 | 28.5 | 14.4  | n/a  | n/a      | C41 H26 Na |

## HRMS (ESI) spectra of 13

## Elemental Composition Report

Page 1

### Single Mass Analysis

Tolerance = 5.0 mDa / DBE: min = -1.5, max = 50.0

Element prediction: Off

Number of isotope peaks used for i-FIT = 3

Monoisotopic Mass, Even Electron Ions

3 formula(e) evaluated with 1 results within limits (up to 50 best isotopic matches for each mass)

Elements Used:

C: 0-41 H: 0-27 B: 0-1 Na: 0-1

20240120-1-2-Pos 92 (0.380)

1: TOF MS ES+

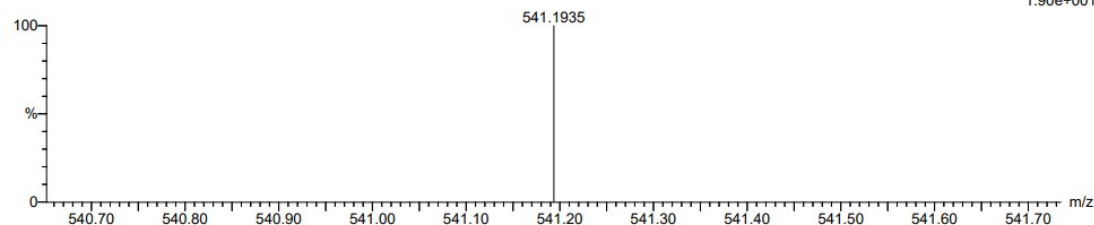

Minimum: -1.5  
Maximum: 5.0 10.0 50.0

| Mass     | Calc. Mass | mDa | PPM | DBE  | i-FIT | Norm | Conf (%) | Formula    |
|----------|------------|-----|-----|------|-------|------|----------|------------|
| 541.1935 | 541.1932   | 0.3 | 0.6 | 28.5 | 14.7  | n/a  | n/a      | C41 H26 Na |

## HRMS (ESI) spectra of 14

## 7. References

1. H. E. Gottlieb, V. Kotlyar and A. Nudelman, NMR Chemical Shifts of Common Laboratory Solvents as Trace Impurities, *J Org Chem*, 1997, **62**, 7512-7515.
2. H. G. Alt and R. Zenk, Syndiospezifische polymerisation von propylen: 2- und 2,7-substituierte metallocenkomplex des typs  $(C_{13}H_{8-n}R_nCR'_2C_5H_4)MCl_2$  ( $n = 1,2$ ; R = alkoxy, alkyl, aryl, hal; R'=Me, Ph; M = Zr, Hf), *J.Organomet*, 1996,

- 522**, 39-54.
3. Z. Zhou, Y. Zhao, H. Zhen, Z. Lin and Q. J. A. O. C. Ling, Poly(ethylene glycol)- and glucopyranoside-substituted N-heterocyclic carbene precursors for the synthesis of arylfluorene derivatives using efficient palladium-catalyzed aqueous Suzuki reaction, *Appl. Organomet. Chem.* 2016, **30**, 924-931.
  4. J. J. Esteb, M. Bergeron, C. N. Dormady, J. C. W. Chien and M. D. Rausch, Novel C1 symmetric zirconocenes containing substituted fluorenyl moieties for the polymerization of olefins, *J. Organomet.*, 2003, **675**, 97-104.
